# Supplementary material for: The effects of bromine atoms on the photophysical and photochemical properties of 3-cinnamoylcoumarin derivatives
Source: Royal Society of Chemistry journal article supplement (doi:10.1039/c8nj00966j), 2018-01-01
Supplement: c8nj00966j1.pdf [file c8nj00966j1.pdf]

## Supporting information

### The effects of bromine atom on the photophysical and photochemical properties of 3-cinnamoylcoumarin derivatives

Zhiyuan Sun<sup>a,c</sup>, Yu Wang<sup>a,c</sup>, De-Cai Fang<sup>b,\*</sup>, Yuxia Zhao<sup>a,\*</sup>

<sup>a</sup>Technical Institute of Physics and Chemistry, CAS, Beijing, 100190, China;

<sup>b</sup>College of Chemistry, Beijing Normal University, Beijing 100875, China;

<sup>c</sup>University of Chinese Academy of Sciences, Beijing, 100049, China

E-mail: yuxia.zhao@mail.ipc.ac.cn; dcfang@bnu.edu.cn

#### 1. The synthesizes of T1–T8.

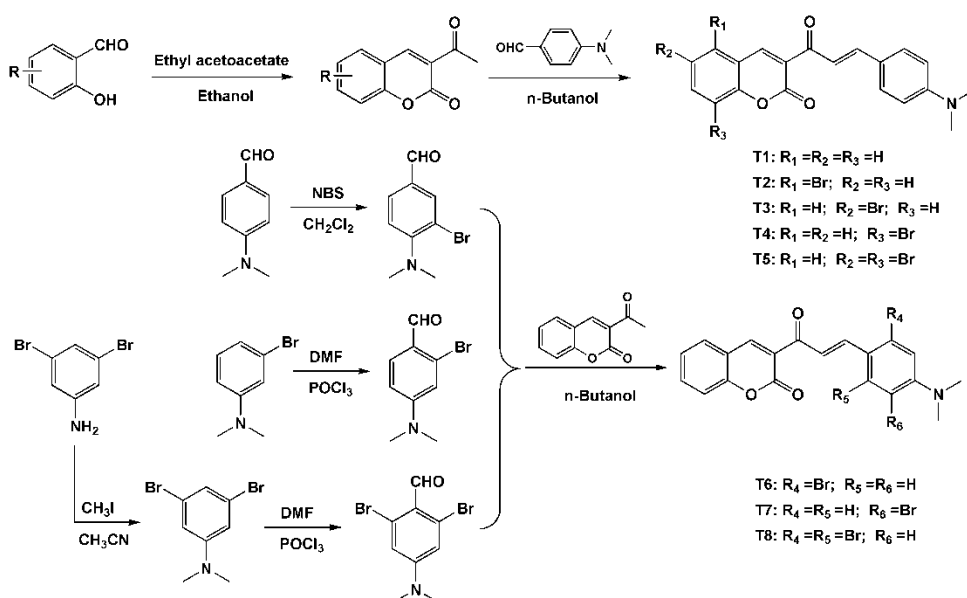

3-bromo-4-(dimethylamino)benzaldehyde

<sup>1</sup>H NMR (400 MHz, CDCl<sub>3</sub>) δ (ppm) 2.95 (s, 6H, -CH<sub>3</sub>), 7.07 (d, 1H, *J* = 8.0 Hz, phenyl-H), 7.73 (d, 1H, *J* = 8.0 Hz, phenyl-H), 8.03 (s, 1H, phenyl-H), 9.81 (s, 1H, -CHO).

2-bromo-4-(dimethylamino)benzaldehyde

<sup>1</sup>H NMR (400 MHz, CDCl<sub>3</sub>) δ (ppm) 3.08 (s, 6H, -CH<sub>3</sub>), 6.65 (d, 1H, *J* = 8.0 Hz, phenyl-H), 6.81 (s, 1H, phenyl-H), 7.80 (d, 1H, *J* = 8.0 Hz, phenyl-H), 10.09 (s, 1H, -CHO).

2,6-dibromo-4-(dimethylamino)benzaldehyde

$^1\text{H}$  NMR (400 MHz,  $\text{CDCl}_3$ )  $\delta$  (ppm) 3.07 (s, 6H,  $-\text{CH}_3$ ), 6.86 (s, 2H phenyl-H), 10.15 (s, 1H,  $-\text{CHO}$ ).

#### 3-(3-(4-(dimethylamino)phenyl)acryloyl)-2H-chromen-2-one (**T1**)

4-(dimethylamino)benzaldehyde (0.22 g, 1.5 mmol) and 3-acetyl-2H-chromen-2-one (0.40 g, 1.5 mmol) were dissolved in *n*-butanol under stirring. Then 0.2 mL of glacial acetic acid and 0.2 mL of piperidine were added to the solution. The reaction mixture was refluxed for 4 h under nitrogen atmosphere, and then the solvent was removed in vacuum. The crude product was purified by silica gel column chromatography using petroleum ether: ethyl acetate (5:1) as eluent to give the target PS **T1** (0.17 g, yield 36%).  $^1\text{H}$  NMR (400 MHz,  $\text{CDCl}_3$ )  $\delta$  (ppm) 3.06 (s, 6H,  $-\text{CH}_3$ ), 6.69 (d, 2H,  $J = 8.0$  Hz, phenyl-H), 7.32-7.36 (m, 1H, coumarin-H), 7.39 (d, 1H,  $J = 8.0$  Hz, coumarin-H), 7.59 (d, 1H,  $J = 8.0$  Hz, phenyl-H), 7.63-7.67 (m, 1H, coumarin-H), 7.74 (d, 1H,  $J = 16.0$  Hz,  $-\text{C}=\text{C}-\text{H}$ ), 7.88 (d, 1H,  $J = 16.0$  Hz,  $-\text{C}=\text{C}-\text{H}$ ), 8.56 (s, 1H, coumarin-H).  $^{13}\text{C}$  NMR (100 MHz,  $\text{CDCl}_3$ )  $\delta$  (ppm) 185.95, 159.42, 155.09, 152.25, 146.41, 133.72, 131.11, 129.82, 126.11, 124.81, 122.86, 118.78, 116.61, 111.87, 40.17. MS (EI):  $m/z$  Calcd for  $\text{C}_{29}\text{H}_{17}\text{NO}_3$  319.12; found 319.10.

#### 3-(3-(4-(dimethylamino)phenyl)acryloyl)-5-bromo-2H-chromen-2-one (**T2**)

**T2** was prepared by an analogous method to that used for **T1**. The crude product was purified by column chromatography on  $\text{SiO}_2$  using petroleum ether: ethyl acetate (5:1) as eluent to give **T2** (0.12 g, yield 20%).  $^1\text{H}$  NMR (400 MHz,  $\text{CDCl}_3$ )  $\delta$  (ppm) 3.12 (s, 6H,  $-\text{CH}_3$ ), 7.15 (d, 2H,  $J = 8.0$  Hz, phenyl-H), 7.35 (d, 1H,  $J = 8.0$  Hz, coumarin-H), 7.46-7.50 (m, 1H, coumarin-H), 7.58 (d, 1H,  $J = 8.0$  Hz, coumarin-H), 7.68 (d, 2H,  $J = 8.0$  Hz, phenyl-H), 7.77 (d, 1H,  $J = 12.0$  Hz,  $-\text{C}=\text{C}-\text{H}$ ), 7.87 (d, 1H,  $J = 16.0$  Hz,  $-\text{C}=\text{C}-\text{H}$ ), 8.86 (s, 1H, coumarin-H).  $^{13}\text{C}$  NMR (100 MHz,  $\text{CDCl}_3$ )  $\delta$  (ppm) 185.53, 158.73, 155.60, 152.30, 146.77, 145.60, 133.81, 131.18, 128.89, 127.11, 124.32, 122.76, 118.97, 118.57, 116.10, 111.89, 40.18. MS (EI):  $m/z$  Calcd for  $\text{C}_{20}\text{H}_{16}\text{NO}_3\text{Br}$  397.03; found 397.00.

#### 3-(3-(4-(dimethylamino)phenyl)acryloyl)-6,8-dibromo-2H-chromen-2-one (**T3**)

**T3** was prepared by an analogous method to that used for **T1**. The crude product was purified by column chromatography on SiO<sub>2</sub> using petroleum ether: ethyl acetate (5:1) as eluent to give **T3** (0.21 g, yield 35%).

<sup>1</sup>H NMR (400 MHz, CDCl<sub>3</sub>) δ (ppm) 3.11 (s, 6H, -CH<sub>3</sub>), 7.11 (d, 2H, *J* = 8.0 Hz, phenyl-H), 7.29 (d, 1H, *J* = 8.0 Hz, coumarin-H), 7.66 (d, 2H, *J* = 8.0 Hz, phenyl-H), 7.73 (d, 1H, *J* = 8.0 Hz, coumarin-H), 7.78 (d, 1H, *J* = 16.0 Hz, -C=C-H), 7.80 (s, 1H, coumarin-H), 7.82 (d, 1H, *J* = 16.0 Hz, -C=C-H), 8.48 (s, 1H, coumarin-H). <sup>13</sup>C NMR (100 MHz, CDCl<sub>3</sub>) δ (ppm) 185.62, 158.32, 153.63, 151.67, 146.34, 145.68, 136.33, 132.04, 131.65, 126.85, 120.09, 118.97, 117.88, 117.24, 112.64, 40.58. MS (EI): *m/z* Calcd for C<sub>20</sub>H<sub>16</sub>NO<sub>3</sub>Br 397.03; found 397.00.

3-(3-(4-(dimethylamino)phenyl)acryloyl)-8-bromo-2*H*-chromen-2-one (**T4**)

**T4** was prepared by an analogous method to that used for **T1**. The crude product was purified by column chromatography on SiO<sub>2</sub> using petroleum ether: ethyl acetate (5:1) as eluent to give **T4** (0.20 g, yield 33%). <sup>1</sup>H NMR (400 MHz, CDCl<sub>3</sub>) δ (ppm) 3.10 (s, 6H, -CH<sub>3</sub>), 7.00 (d, 2H, *J* = 8.0 Hz, phenyl-H), 7.21-7.26 (m, 1H, coumarin-H), 7.62 (d, 1H, *J* = 8.0 Hz, coumarin-H), 7.64 (d, 2H, *J* = 8.0 Hz, phenyl-H), 7.76 (d, 1H, *J* = 16.0 Hz, -C=C-H), 7.87 (d, 1H, *J* = 8.0 Hz, coumarin-H), 7.88 (d, 1H, *J* = 16.0 Hz, -C=C-H), 8.52 (s, 1H, coumarin-H). δ (ppm) 185.43, 158.38, 153.63, 146.67, 136.99, 134.64, 131.20, 130.45, 128.99, 127.91, 125.47, 123.50, 118.75, 113.65, 112.22, 110.68, 40.41. MS (EI): *m/z* Calcd for C<sub>20</sub>H<sub>16</sub>NO<sub>3</sub>Br 397.03; found 397.00.

3-(3-(4-(dimethylamino)phenyl)acryloyl)-6,8-dibromo-2*H*-chromen-2-one (**T5**)

**T5** was prepared by an analogous method to that used for **T1**. The crude product was purified by column chromatography on SiO<sub>2</sub> using petroleum ether: ethyl acetate (5:1) as eluent to give **T5** (0.08 g, yield 12%). <sup>1</sup>H NMR (400 MHz, CDCl<sub>3</sub>) δ (ppm) 3.11 (s, 6H, -CH<sub>3</sub>), 7.10 (d, 2H, *J* = 8.0 Hz, phenyl-H), 7.66 (d, 2H, *J* = 8.0 Hz, phenyl-H), 7.74 (d, 1H, *J* = 16.0 Hz, -C=C-H), 7.74 (s, 1H, coumarin-H), 7.87 (d, 1H, *J* = 16.0 Hz, -C=C-H), 7.98 (s, 1H, *J* = 8.0 Hz, coumarin-H), 8.43 (s, 1H, coumarin-H). δ (ppm) 184.96, 157.83, 153.63, 150.87, 147.21, 145.26, 138.94, 131.36, 131.04, 127.78, 121.06, 118.42, 117.29, 112.24, 111.21, 40.42. MS (EI): *m/z* Calcd for

$C_{20}H_{15}NO_3Br_2$  474.94; found 474.90.

3-(3-(2-bromo-4-(dimethylamino)phenyl)acryloyl)-2*H*-chromen-2-one (**T6**)

**T6** was prepared by an analogous method to that used for **T1**. The crude product was purified by column chromatography on SiO<sub>2</sub> using petroleum ether: ethyl acetate (5:1) as eluent to give **T6** (0.31 g, yield 52%). <sup>1</sup>H NMR (400 MHz, CDCl<sub>3</sub>) δ (ppm) 3.04 (s, 6H, -CH<sub>3</sub>), 6.66 (d, 1H, *J* = 8.0 Hz, phenyl-H), 6.90 (s, 1H, phenyl-H), 7.33-7.36 (m, 1H, coumarin-H), 7.39 (d, 1H, *J* = 8.0 Hz, coumarin-H), 7.62-7.68 (m, 2H, coumarin-H), 7.74 (d, 1H, *J* = 16.0 Hz, -C=C-H), 7.76 (d, 1H, *J* = 8.0 Hz, phenyl-H), 8.26 (d, 1H, *J* = 16.0 Hz, -C=C-H), 8.57 (s, 1H, coumarin-H). <sup>13</sup>C NMR (100 MHz, CDCl<sub>3</sub>) δ (ppm) 186.07, 159.71, 155.40, 152.72, 147.77, 144.48, 134.13, 130.18, 129.38, 126.11, 125.13, 121.95, 119.00, 116.90, 115.81, 111.57, 40.35. MS (EI): *m/z* Calcd for  $C_{20}H_{16}NO_3Br$  397.03; found 397.00.

3-(3-(3-bromo-4-(dimethylamino)phenyl)acryloyl)-2*H*-chromen-2-one (**T7**)

**T7** was prepared by an analogous method to that used for **T1**. The crude product was purified by column chromatography on SiO<sub>2</sub> using petroleum ether: ethyl acetate (5:1) as eluent to give **T7** (0.10 g, yield 26%). <sup>1</sup>H NMR (400 MHz, CDCl<sub>3</sub>) δ (ppm) 2.94 (s, 6H, -CH<sub>3</sub>), 7.19 (d, 1H, *J* = 8.0 Hz, phenyl-H), 7.34-7.38 (m, 1H, coumarin-H), 7.41 (d, 1H, *J* = 8.0 Hz, coumarin-H), 7.58 (d, 1H, *J* = 8.0 Hz, phenyl-H), 7.65-7.69 (m, 1H, coumarin-H), 7.68 (d, 1H, *J* = 8.0 Hz, coumarin-H), 7.76 (d, 1H, *J* = 16.0 Hz, -C=C-H), 7.84 (d, 1H, *J* = 12.0 Hz, -C=C-H), 7.88 (s, 1H, phenyl-H), 8.59 (s, 1H, coumarin-H). <sup>13</sup>C NMR (100 MHz, CDCl<sub>3</sub>) δ (ppm) 186.39, 159.62, 155.52, 148.27, 143.68, 134.87, 134.47, 130.29, 129.26, 125.64, 125.24, 123.13, 120.40, 118.88, 118.15, 116.99, 40.35. MS (EI): *m/z* Calcd for  $C_{20}H_{16}NO_3Br$  397.03; found 397.00.

3-(3-(2,6-dibromo-4-(dimethylamino)phenyl)acryloyl)-2*H*-chromen-2-one (**T8**)

**T8** was prepared by an analogous method to that used for **T1**. The crude product was purified by column chromatography on SiO<sub>2</sub> using petroleum ether: ethyl acetate (5:1) as eluent to give **T8** (0.05 g, yield 11%). <sup>1</sup>H

NMR (400 MHz, CDCl<sub>3</sub>)  $\delta$  (ppm) 3.04 (s, 6H, -CH<sub>3</sub>), 7.13 (s, 2H, phenyl-H), 7.34-7.40 (m, 1H, coumarin-H), 7.39 (d, 1H,  $J = 8.0$  Hz, coumarin-H), 7.66-7.69 (m, 1H, coumarin-H), 7.68 (d, 1H,  $J = 8.0$  Hz, coumarin-H), 7.79 (d, 1H,  $J = 16.0$  Hz, -C=C-H), 8.04 (d, 1H,  $J = 16.0$  Hz, -C=C-H), 8.58 (s, 1H, coumarin-H).  $\delta$  (ppm) 186.70, 159.36, 155.50, 151.21, 147.85, 143.43, 134.24, 130.20, 128.26, 126.64, 125.12, 121.70, 118.91, 116.96, 116.42, 40.25.

MS (EI): m/z Calcd for C<sub>20</sub>H<sub>15</sub>NO<sub>3</sub>Br<sub>2</sub> 474.94; found 474.90.

Figure S1. The photostability of the PSs T1–T8 with the irradiation time in toluene solution

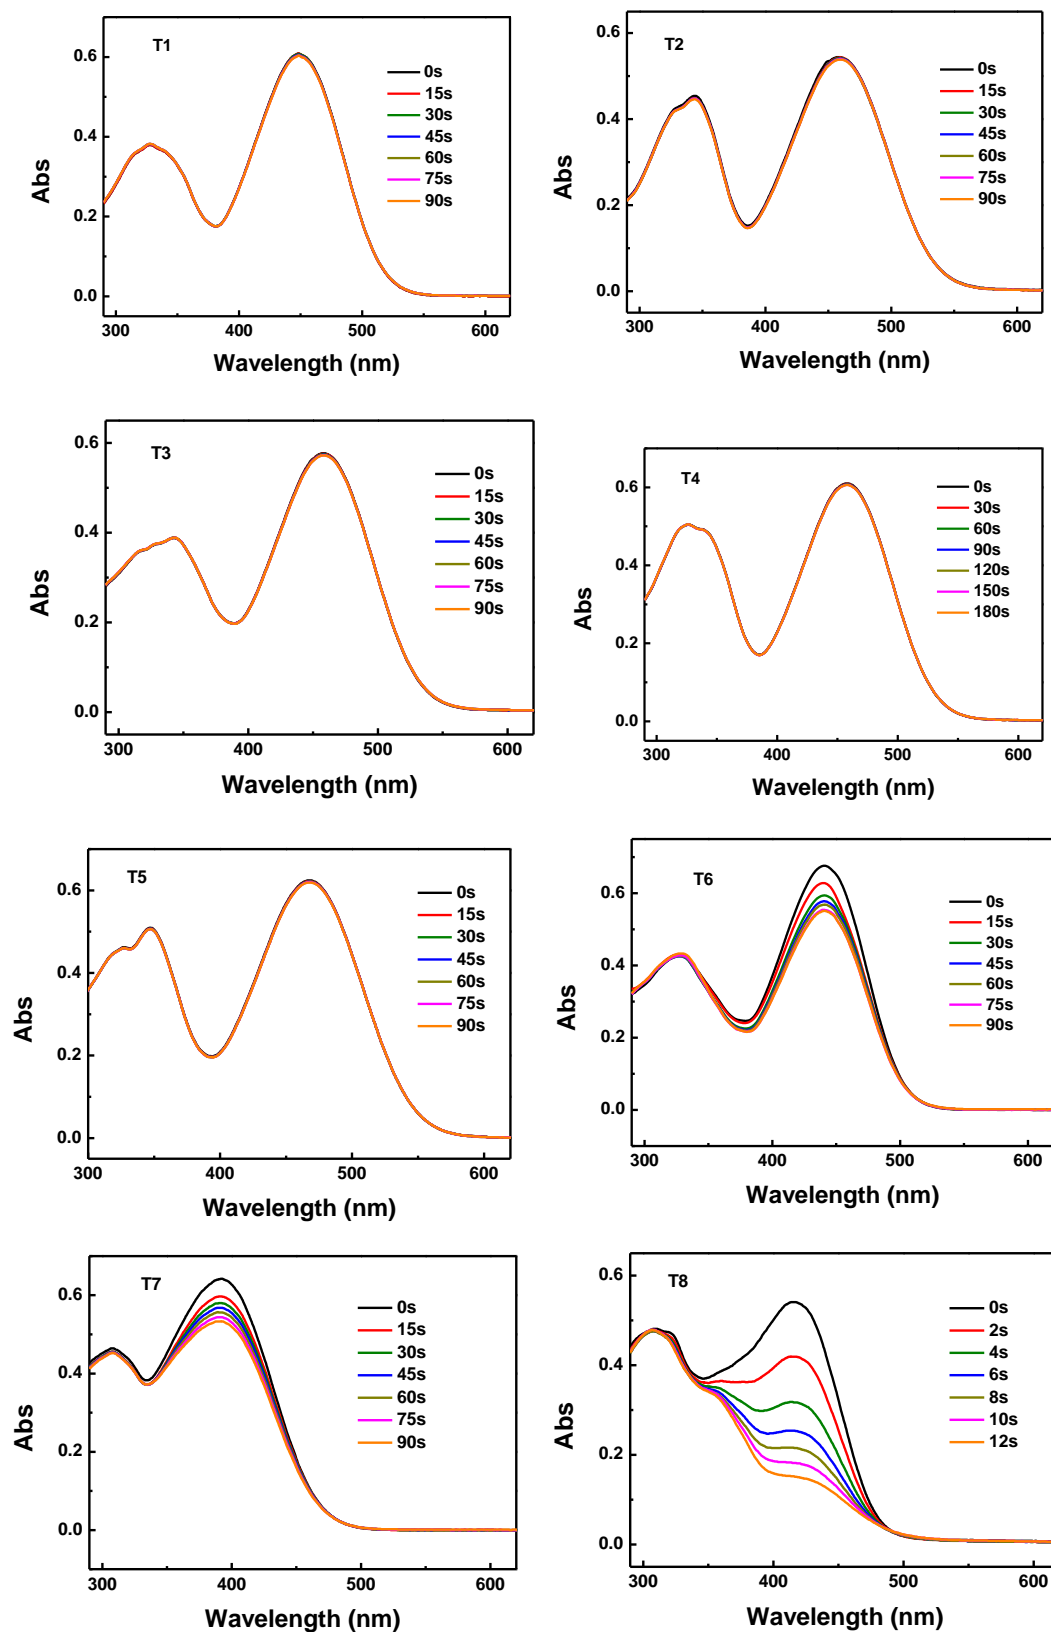

Figure S2. The cyclic voltammetry of the PSs T1–T8 in acetonitrile (0.1 M TBAPF6)

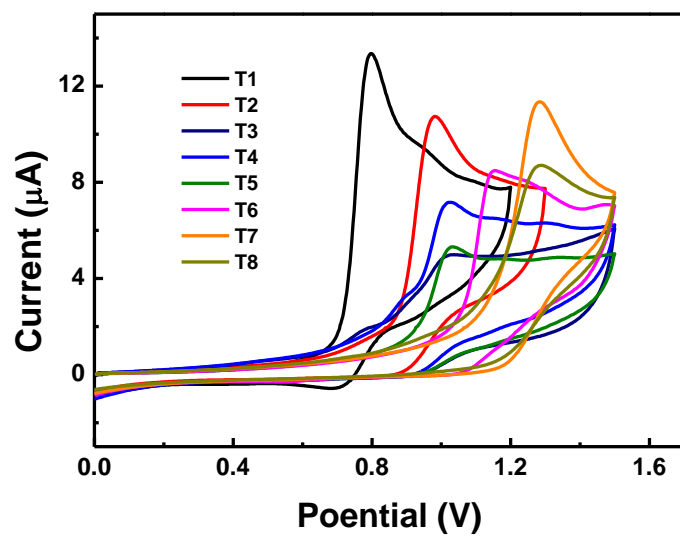

**Table S1** The obtained absorption and emission spectra ( $\lambda_{\max}^{\text{abs}}$  and  $\lambda_{\max}^{\text{fl}}$ , in nm) from three different functionals (PBE1PBE, CAM-B3LYP and WB97XD) and experiments

|                               | Method    | Compound |      |      |      |      |      |      |      |
|-------------------------------|-----------|----------|------|------|------|------|------|------|------|
|                               |           | T1       | T2   | T3   | T4   | T5   | T6   | T7   | T8   |
| $\lambda_{\max}^{\text{abs}}$ | PBE1PBE   | 476      | 499  | 496  | 493  | 514  | 458  | 434  | 442  |
|                               | CAM-B3LYP | 375      | 383  | 383  | 382  | 390  | 367  | 343  | 356  |
|                               | WB97XD    | 363      | 369  | 369  | 369  | 375  | 357  | 334  | 354  |
|                               | Exp.      | 448      | 459  | 459  | 458  | 468  | 440  | 391  | 416  |
| $f_a$                         | PBE1PBE   | 0.62     | 0.55 | 0.58 | 0.57 | 0.53 | 0.65 | 0.63 | 0.57 |
|                               | CAM-B3LYP | 1.14     | 1.06 | 1.09 | 1.07 | 1.02 | 1.16 | 1.21 | 0.47 |
|                               | WB97XD    | 1.29     | 1.24 | 1.26 | 1.23 | 1.20 | 1.29 | 1.36 | 0.17 |
| $\lambda_{\max}^{\text{fl}}$  | PBE1PBE   | 600      | 642  | 639  | 633  | 670  | 567  | 573  | 576  |
|                               | CAM-B3LYP | 427      | 448  | 445  | 442  | 461  | 416  | 372  | 437  |
|                               | WB97XD    | 420      | 422  | 421  | 419  | 431  | 405  | 361  | 437  |
|                               | Exp.      | 584      | 612  | 608  | 604  | 620  | 562  | 560  | 536  |
| $f_e$                         | PBE1PBE   | 0.38     | 0.36 | 0.37 | 0.37 | 0.35 | 0.40 | 0.38 | 0.28 |
|                               | CAM-B3LYP | 1.02     | 0.87 | 0.90 | 0.89 | 0.80 | 1.12 | 1.12 | 0.18 |
|                               | WB97XD    | 1.26     | 1.15 | 1.19 | 1.17 | 1.09 | 1.29 | 1.28 | 0.06 |

$\lambda_{\max}^{\text{abs}}$  is the absorption maximum,  $f_a$  is the absorption oscillator strengths,  $\lambda_{\max}^{\text{fl}}$  is the fluorescence emission maximum,  $f_e$  is the emission oscillator strengths.



**Table S2.** The Cartesian Coordinates (in Å) of species studied, optimized with PBE1PBE+IDSCRF/6-31G(d)

| Compounds                | Cartesian coordinates |          |          |          | Species                   | Cartesian coordinates |          |          |          |
|--------------------------|-----------------------|----------|----------|----------|---------------------------|-----------------------|----------|----------|----------|
| <b>T1</b> (ground state) | H                     | 7.01483  | 4.63155  | -5.50954 | <b>T1</b> (excited state) | H                     | -5.89879 | 2.73048  | -0.00016 |
|                          | C                     | 7.39154  | 4.91463  | -4.53176 |                           | C                     | -5.96346 | 1.64635  | -0.00014 |
|                          | C                     | 7.63736  | 6.23750  | -4.19396 |                           | C                     | -7.19662 | 0.98714  | -0.00026 |
|                          | C                     | 8.12407  | 6.58157  | -2.92497 |                           | C                     | -7.23769 | -0.41230 | -0.00024 |
|                          | C                     | 8.36563  | 5.59282  | -1.98926 |                           | C                     | -6.06765 | -1.14960 | -0.00011 |
|                          | C                     | 8.12503  | 4.24402  | -2.30564 |                           | C                     | -4.80009 | -0.51079 | 0.00003  |
|                          | C                     | 7.63821  | 3.92665  | -3.58199 |                           | C                     | -4.79402 | 0.90789  | 0.00000  |
|                          | O                     | 7.39287  | 2.64175  | -3.92846 |                           | O                     | -3.61413 | 1.59775  | 0.00013  |
|                          | C                     | 7.59197  | 1.56032  | -3.08701 |                           | C                     | -2.36504 | 0.98880  | 0.00037  |
|                          | C                     | 8.10019  | 1.86318  | -1.74718 |                           | C                     | -2.34331 | -0.44735 | 0.00026  |
|                          | C                     | 8.34410  | 3.15879  | -1.40743 |                           | C                     | -3.56393 | -1.16755 | 0.00012  |
|                          | H                     | 7.44837  | 7.01658  | -4.92748 |                           | H                     | -8.11641 | 1.56426  | -0.00037 |
|                          | H                     | 8.31013  | 7.62287  | -2.67981 |                           | H                     | -8.19648 | -0.92457 | -0.00034 |
|                          | H                     | 8.74302  | 5.84040  | -1.00023 |                           | H                     | -6.09834 | -2.23646 | -0.00011 |
|                          | H                     | 8.72100  | 3.34783  | -0.40433 |                           | H                     | -3.51648 | -2.25108 | 0.00007  |
|                          | C                     | 8.38157  | 0.82570  | -0.68760 |                           | C                     | -1.11620 | -1.21796 | 0.00024  |
|                          | O                     | 8.80739  | 1.22451  | 0.39732  |                           | O                     | -1.11033 | -2.45317 | -0.00007 |
|                          | O                     | 7.32185  | 0.47919  | -3.55629 |                           | O                     | -1.42751 | 1.77659  | 0.00010  |
|                          | C                     | 8.14814  | -0.58681 | -0.96809 |                           | C                     | 0.23241  | -0.53108 | 0.00020  |
|                          | H                     | 7.77240  | -0.85339 | -1.94768 |                           | H                     | 0.22904  | 0.55363  | 0.00035  |
|                          | C                     | 8.40491  | -1.50824 | -0.00840 |                           | C                     | 1.35652  | -1.27346 | 0.00001  |
|                          | H                     | 8.78086  | -1.12374 | 0.94060  |                           | H                     | 1.24034  | -2.35637 | -0.00011 |
|                          | C                     | 8.24088  | -2.93946 | -0.09018 |                           | C                     | 2.70806  | -0.75088 | -0.00002 |
|                          | C                     | 8.56429  | -3.73654 | 1.02180  |                           | C                     | 3.79710  | -1.65171 | -0.00005 |
|                          | C                     | 7.76757  | -3.60839 | -1.23538 |                           | C                     | 3.00957  | 0.63317  | -0.00002 |
|                          | C                     | 8.42992  | -5.11148 | 1.00790  |                           | C                     | 5.10121  | -1.21802 | -0.00007 |
|                          | C                     | 7.62625  | -4.97958 | -1.26961 |                           | C                     | 4.30431  | 1.08732  | -0.00004 |
|                          | C                     | 7.95417  | -5.77724 | -0.14492 |                           | C                     | 5.39701  | 0.17373  | -0.00006 |
|                          | H                     | 8.93322  | -3.25354 | 1.92454  |                           | H                     | 3.59265  | -2.71899 | -0.00005 |
|                          | H                     | 7.50368  | -3.03741 | -2.12174 |                           | H                     | 2.20215  | 1.35847  | -0.00001 |
|                          | H                     | 8.69524  | -5.67379 | 1.89594  |                           | H                     | 5.90038  | -1.94961 | -0.00008 |
|                          | N                     | 7.81509  | -7.13688 | -0.17597 |                           | N                     | 6.67831  | 0.61646  | -0.00009 |
| C                        | 7.32626               | -7.79015 | -1.36866 | C        | 6.96723                   | 2.03944               | -0.00007 |          |          |
| H                        | 7.98314               | -7.60974 | -2.23042 | H        | 6.55213                   | 2.52390               | 0.89099  |          |          |
| H                        | 7.28633               | -8.86658 | -1.19682 | H        | 8.04634                   | 2.18544               | -0.00021 |          |          |
| H                        | 6.31490               | -7.45245 | -1.63279 | H        | 6.55192                   | 2.52395               | -0.89100 |          |          |
| C                        | 8.15726               | -7.92475 | 0.98563  | C        | 7.78419                   | -0.32433              | -0.00005 |          |          |
| H                        | 7.54679               | -7.65114 | 1.85707  | H        | 7.75708                   | -0.96168              | -0.89120 |          |          |
| H                        | 7.98047               | -8.97913 | 0.76927  | H        | 8.72314                   | 0.22718               | -0.00007 |          |          |
| H                        | 9.21484               | -7.80815 | 1.25925  | H        | 7.75708                   | -0.96162              | 0.89114  |          |          |
| H                        | 7.25728               | -5.44322 | -2.17755 | H        | 4.48420                   | 2.15574               | -0.00003 |          |          |

|                  |    |          |          |          |                    |    |          |          |          |
|------------------|----|----------|----------|----------|--------------------|----|----------|----------|----------|
| T2(ground state) | H  | -4.58570 | 3.77402  | -0.13944 | T2 (excited state) | H  | -4.42435 | 3.79623  | 0.00122  |
|                  | C  | -4.73427 | 2.70157  | -0.06974 |                    | C  | -4.62552 | 2.72961  | 0.00087  |
|                  | C  | -5.99667 | 2.13492  | -0.00636 |                    | C  | -5.93117 | 2.22964  | 0.00071  |
|                  | C  | -6.16608 | 0.74847  | 0.08319  |                    | C  | -6.15182 | 0.85075  | 0.00027  |
|                  | C  | -5.05312 | -0.07024 | 0.10880  |                    | C  | -5.07521 | -0.01617 | -0.00002 |
|                  | C  | -3.74935 | 0.46240  | 0.04650  |                    | C  | -3.72815 | 0.43776  | 0.00010  |
|                  | C  | -3.62606 | 1.85918  | -0.04259 |                    | C  | -3.55938 | 1.85059  | 0.00056  |
|                  | O  | -2.40722 | 2.43769  | -0.10585 |                    | O  | -2.30812 | 2.39248  | 0.00074  |
|                  | C  | -1.20829 | 1.74289  | -0.08983 |                    | C  | -1.13479 | 1.64336  | 0.00053  |
|                  | C  | -1.31068 | 0.28617  | 0.00323  |                    | C  | -1.28437 | 0.21772  | -0.00005 |
|                  | C  | -2.53989 | -0.29298 | 0.06598  |                    | C  | -2.57764 | -0.35568 | -0.00016 |
|                  | H  | -6.87427 | 2.77481  | -0.02623 |                    | H  | -6.77547 | 2.91163  | 0.00093  |
|                  | H  | -7.15935 | 0.31581  | 0.13228  |                    | H  | -7.16118 | 0.45242  | 0.00016  |
|                  | H  | -2.57636 | -1.37732 | 0.13302  |                    | H  | -2.65877 | -1.43592 | -0.00047 |
|                  | C  | -0.12631 | -0.65214 | 0.03541  |                    | C  | -0.15295 | -0.69488 | -0.00056 |
|                  | O  | -0.36326 | -1.85844 | 0.10114  |                    | O  | -0.29564 | -1.91913 | -0.00070 |
|                  | O  | -0.21195 | 2.42263  | -0.15564 |                    | O  | -0.11369 | 2.31715  | 0.00094  |
|                  | C  | 1.22850  | -0.11597 | -0.00770 |                    | C  | 1.26699  | -0.17194 | -0.00123 |
|                  | H  | 1.34804  | 0.95826  | -0.06646 |                    | H  | 1.39269  | 0.90523  | -0.00337 |
|                  | C  | 2.28307  | -0.96691 | 0.02723  |                    | C  | 2.29419  | -1.04245 | 0.00089  |
|                  | H  | 2.04316  | -2.02932 | 0.08603  |                    | H  | 2.05088  | -2.10409 | 0.00286  |
|                  | C  | 3.68657  | -0.63637 | -0.00335 |                    | C  | 3.69877  | -0.68401 | 0.00056  |
|                  | C  | 4.64051  | -1.66827 | 0.04372  |                    | C  | 4.67312  | -1.70724 | 0.00193  |
|                  | C  | 4.17846  | 0.68117  | -0.07831 |                    | C  | 4.16093  | 0.65452  | -0.00100 |
|                  | C  | 5.99882  | -1.41837 | 0.01885  |                    | C  | 6.01953  | -1.43060 | 0.00163  |
|                  | C  | 5.53005  | 0.95178  | -0.10430 |                    | C  | 5.50009  | 0.95287  | -0.00132 |
|                  | C  | 6.48644  | -0.09334 | -0.05618 |                    | C  | 6.47728  | -0.08342 | -0.00012 |
|                  | H  | 4.29652  | -2.69907 | 0.10197  |                    | H  | 4.34413  | -2.74294 | 0.00326  |
|                  | H  | 3.48186  | 1.51455  | -0.11718 |                    | H  | 3.44499  | 1.47022  | -0.00186 |
|                  | H  | 6.68722  | -2.25484 | 0.05798  |                    | H  | 6.72669  | -2.25142 | 0.00276  |
|                  | N  | 7.82692  | 0.17179  | -0.08138 |                    | N  | 7.80154  | 0.20545  | -0.00058 |
|                  | C  | 8.29657  | 1.53648  | -0.15649 |                    | C  | 8.25611  | 1.58455  | -0.00214 |
|                  | H  | 7.96462  | 2.12977  | 0.70635  |                    | H  | 7.90188  | 2.11518  | 0.88888  |
|                  | H  | 9.38727  | 1.53997  | -0.16658 |                    | H  | 9.34488  | 1.60237  | -0.00341 |
|                  | H  | 7.94871  | 2.03699  | -1.07027 |                    | H  | 7.89991  | 2.11371  | -0.89322 |
|                  | C  | 8.77933  | -0.91342 | -0.02768 |                    | C  | 8.78913  | -0.85883 | 0.00132  |
|                  | H  | 8.66474  | -1.59736 | -0.87966 |                    | H  | 8.68689  | -1.49025 | -0.88857 |
|                  | H  | 9.79052  | -0.50561 | -0.05783 |                    | H  | 9.78644  | -0.42165 | 0.00012  |
|                  | H  | 8.67763  | -1.49854 | 0.89653  |                    | H  | 8.68740  | -1.48667 | 0.89381  |
|                  | H  | 5.85411  | 1.98474  | -0.16241 |                    | H  | 5.80474  | 1.99256  | -0.00242 |
|                  | Br | -5.29994 | -1.93572 | 0.22981  |                    | Br | -5.41182 | -1.88074 | -0.00060 |

|                  |    |         |          |          |                   |    |          |          |          |
|------------------|----|---------|----------|----------|-------------------|----|----------|----------|----------|
| T3(ground state) | H  | 7.01458 | 4.64017  | -5.50819 | T3(excited state) | H  | -4.23762 | 3.19326  | 0.00008  |
|                  | C  | 7.39186 | 4.91710  | -4.52898 |                   | C  | -4.35506 | 2.11394  | 0.00005  |
|                  | C  | 7.63581 | 6.24025  | -4.19774 |                   | C  | -5.62600 | 1.53002  | 0.00006  |
|                  | C  | 8.12263 | 6.56733  | -2.92625 |                   | C  | -5.72050 | 0.13715  | 0.00003  |
|                  | C  | 8.36814 | 5.58865  | -1.98324 |                   | C  | -4.60707 | -0.67761 | -0.00001 |
|                  | C  | 8.12504 | 4.24325  | -2.30625 |                   | C  | -3.30981 | -0.10138 | -0.00001 |
|                  | C  | 7.63782 | 3.92607  | -3.58146 |                   | C  | -3.22647 | 1.31554  | 0.00002  |
|                  | O  | 7.39177 | 2.64409  | -3.92943 |                   | O  | -2.01396 | 1.93901  | 0.00002  |
|                  | C  | 7.59129 | 1.56113  | -3.08731 |                   | C  | -0.79765 | 1.26132  | -0.00001 |
|                  | C  | 8.10055 | 1.86464  | -1.74698 |                   | C  | -0.85714 | -0.17261 | -0.00005 |
|                  | C  | 8.34542 | 3.15819  | -1.40528 |                   | C  | -2.11260 | -0.82537 | -0.00005 |
|                  | H  | 7.45040 | 7.02653  | -4.92236 |                   | H  | -6.51907 | 2.14402  | 0.00008  |
|                  | H  | 8.74563 | 5.84641  | -0.99838 |                   | H  | -4.71063 | -1.75784 | -0.00003 |
|                  | H  | 8.72282 | 3.34693  | -0.40242 |                   | H  | -2.12518 | -1.90985 | -0.00008 |
|                  | C  | 8.38260 | 0.82524  | -0.68609 |                   | C  | 0.32975  | -1.01175 | -0.00010 |
|                  | O  | 8.80874 | 1.22756  | 0.39696  |                   | O  | 0.26237  | -2.24276 | -0.00013 |
|                  | O  | 7.32080 | 0.48131  | -3.55622 |                   | O  | 0.18100  | 1.99534  | -0.00001 |
|                  | C  | 8.14887 | -0.58550 | -0.96687 |                   | C  | 1.71495  | -0.40272 | -0.00008 |
|                  | H  | 7.77265 | -0.85288 | -1.94593 |                   | H  | 1.77442  | 0.68013  | -0.00006 |
|                  | C  | 8.40616 | -1.50754 | -0.00681 |                   | C  | 2.79296  | -1.20904 | -0.00007 |
|                  | H  | 8.78263 | -1.12315 | 0.94198  |                   | H  | 2.61447  | -2.28348 | -0.00008 |
|                  | C  | 8.24188 | -2.93777 | -0.08885 |                   | C  | 4.17396  | -0.76700 | -0.00005 |
|                  | C  | 8.56567 | -3.73562 | 1.02292  |                   | C  | 5.20739  | -1.73033 | 0.00009  |
|                  | C  | 7.76774 | -3.60593 | -1.23447 |                   | C  | 4.55529  | 0.59654  | -0.00016 |
|                  | C  | 8.43087 | -5.11023 | 1.00827  |                   | C  | 6.53508  | -1.37399 | 0.00013  |
|                  | C  | 7.62601 | -4.97674 | -1.26939 |                   | C  | 5.87444  | 0.97409  | -0.00013 |
|                  | C  | 7.95430 | -5.77523 | -0.14501 |                   | C  | 6.91166  | -0.00198 | 0.00002  |
|                  | H  | 8.93513 | -3.25312 | 1.92568  |                   | H  | 4.94075  | -2.78381 | 0.00018  |
|                  | H  | 7.50357 | -3.03457 | -2.12048 |                   | H  | 3.79204  | 1.36818  | -0.00029 |
|                  | H  | 8.69636 | -5.67317 | 1.89581  |                   | H  | 7.28983  | -2.15127 | 0.00025  |
|                  | N  | 7.81477 | -7.13418 | -0.17693 |                   | N  | 8.21647  | 0.36553  | 0.00005  |
|                  | C  | 7.32520 | -7.78666 | -1.37011 |                   | C  | 8.58779  | 1.76938  | 0.00002  |
|                  | H  | 7.98185 | -7.60555 | -2.23179 |                   | H  | 8.20134  | 2.27712  | 0.89098  |
|                  | H  | 7.28526 | -8.86316 | -1.19903 |                   | H  | 9.67356  | 1.85228  | 0.00015  |
|                  | H  | 6.31380 | -7.44854 | -1.63325 |                   | H  | 8.20157  | 2.27702  | -0.89110 |
|                  | C  | 8.15703 | -7.92340 | 0.98414  |                   | C  | 9.26583  | -0.63791 | 0.00014  |
|                  | H  | 7.54688 | -7.65011 | 1.85580  |                   | H  | 9.20157  | -1.27266 | -0.89095 |
|                  | H  | 7.97960 | -8.97745 | 0.76690  |                   | H  | 10.23526 | -0.14201 | 0.00003  |
|                  | H  | 9.21475 | -7.80749 | 1.25719  |                   | H  | 9.20166  | -1.27243 | 0.89141  |
|                  | H  | 7.25648 | -5.43987 | -2.17732 |                   | H  | 6.11659  | 2.03010  | -0.00023 |
|                  | Br | 8.44586 | 8.37954  | -2.50290 |                   | Br | -7.44634 | -0.65879 | 0.00003  |

|                  |         |         |          |          |                   |         |          |          |          |
|------------------|---------|---------|----------|----------|-------------------|---------|----------|----------|----------|
| T4(ground state) | C       | 7.39219 | 4.92372  | -4.52963 | T4(excited state) | C       | 5.06950  | -0.34434 | 0.00002  |
|                  | C       | 7.63854 | 6.24621  | -4.19152 |                   | C       | 6.20281  | 0.47341  | 0.00004  |
|                  | C       | 8.12490 | 6.57773  | -2.92250 |                   | C       | 6.03940  | 1.86173  | 0.00005  |
|                  | C       | 8.36483 | 5.58445  | -1.99120 |                   | C       | 4.77766  | 2.42531  | 0.00003  |
|                  | C       | 8.12081 | 4.24058  | -2.31718 |                   | C       | 3.61633  | 1.61104  | 0.00001  |
|                  | C       | 7.63297 | 3.91591  | -3.59212 |                   | C       | 3.79537  | 0.20114  | 0.00000  |
|                  | O       | 7.38851 | 2.63777  | -3.93663 |                   | O       | 2.72706  | -0.63661 | -0.00002 |
|                  | C       | 7.58827 | 1.55249  | -3.09300 |                   | C       | 1.40093  | -0.20102 | -0.00004 |
|                  | C       | 8.09713 | 1.85811  | -1.75464 |                   | C       | 1.18957  | 1.21713  | -0.00004 |
|                  | C       | 8.34009 | 3.15310  | -1.41870 |                   | C       | 2.30154  | 2.09168  | -0.00001 |
|                  | H       | 7.44844 | 7.02216  | -4.92648 |                   | H       | 7.18870  | 0.02253  | 0.00006  |
|                  | H       | 8.74257 | 5.82497  | -1.00113 |                   | H       | 4.65228  | 3.50473  | 0.00004  |
|                  | H       | 8.71764 | 3.34550  | -0.41656 |                   | H       | 2.11172  | 3.15953  | -0.00001 |
|                  | C       | 8.38022 | 0.82183  | -0.69191 |                   | C       | -0.13379 | 1.81736  | -0.00006 |
|                  | O       | 8.80685 | 1.22613  | 0.39038  |                   | O       | -0.30083 | 3.03907  | -0.00002 |
|                  | O       | 7.31769 | 0.47446  | -3.56350 |                   | O       | 0.58243  | -1.10877 | -0.00007 |
|                  | C       | 8.14712 | -0.58924 | -0.97079 |                   | C       | -1.37690 | 0.95530  | -0.00003 |
|                  | H       | 7.77072 | -0.85797 | -1.94946 |                   | H       | -1.22708 | -0.11875 | -0.00002 |
|                  | C       | 8.40487 | -1.51035 | -0.01010 |                   | C       | -2.59109 | 1.53681  | -0.00002 |
|                  | H       | 8.78143 | -1.12498 | 0.93832  |                   | H       | -2.62643 | 2.62540  | -0.00003 |
|                  | C       | 8.24113 | -2.94067 | -0.09056 |                   | C       | -3.85822 | 0.83167  | -0.00001 |
|                  | C       | 8.56530 | -3.73677 | 1.02224  |                   | C       | -5.06174 | 1.57173  | 0.00003  |
|                  | C       | 7.76727 | -3.61055 | -1.23531 |                   | C       | -3.96275 | -0.58051 | -0.00005 |
|                  | C       | 8.43110 | -5.11142 | 1.00949  |                   | C       | -6.29275 | 0.95988  | 0.00004  |
|                  | C       | 7.62616 | -4.98144 | -1.26830 |                   | C       | -5.18107 | -1.21143 | -0.00004 |
|                  | C       | 7.95482 | -5.77814 | -0.14283 |                   | C       | -6.39074 | -0.45958 | 0.00001  |
|                  | H       | 8.93456 | -3.25290 | 1.92434  |                   | H       | -5.00875 | 2.65714  | 0.00006  |
|                  | H       | 7.50285 | -3.04054 | -2.12211 |                   | H       | -3.06229 | -1.18639 | -0.00009 |
|                  | H       | 8.69683 | -5.67307 | 1.89777  |                   | H       | -7.18636 | 1.57250  | 0.00008  |
|                  | N       | 7.81594 | -7.13726 | -0.17271 |                   | N       | -7.59708 | -1.07780 | 0.00002  |
|                  | C       | 7.32668 | -7.79195 | -1.36466 |                   | C       | -7.68358 | -2.52732 | 0.00004  |
|                  | H       | 7.98318 | -7.61196 | -2.22672 |                   | H       | -7.20442 | -2.94864 | 0.89101  |
|                  | H       | 7.28732 | -8.86819 | -1.19172 |                   | H       | -8.73152 | -2.82321 | 0.00011  |
|                  | H       | 6.31508 | -7.45480 | -1.62834 |                   | H       | -7.20454 | -2.94866 | -0.89099 |
|                  | C       | 8.15860 | -7.92442 | 0.98939  |                   | C       | -8.82422 | -0.30193 | 0.00003  |
|                  | H       | 7.54834 | -7.65014 | 1.86070  |                   | H       | -8.88685 | 0.33293  | -0.89110 |
|                  | H       | 7.98170 | -8.97891 | 0.77374  |                   | H       | -9.67635 | -0.97986 | -0.00005 |
|                  | H       | 9.21628 | -7.80756 | 1.26228  |                   | H       | -8.88692 | 0.33281  | 0.89125  |
|                  | H       | 7.25684 | -5.44597 | -2.17560 |                   | H       | -5.20954 | -2.29449 | -0.00007 |
|                  | Br      | 6.73905 | 4.48312  | -6.23506 |                   | Br      | 5.28378  | -2.22230 | 0.00001  |
| H                | 8.31117 | 7.61882 | -2.67771 | H        | 6.91895           | 2.49985 | 0.00007  |          |          |

|                         |    |         |          |          |                          |    |          |          |          |
|-------------------------|----|---------|----------|----------|--------------------------|----|----------|----------|----------|
| <b>T5(ground state)</b> | C  | 7.39246 | 4.92681  | -4.52890 | <b>T5(excited state)</b> | C  | -3.87285 | 1.21103  | -0.00002 |
|                         | C  | 7.63758 | 6.24936  | -4.19357 |                          | C  | -5.09082 | 0.52342  | -0.00012 |
|                         | C  | 8.12354 | 6.56536  | -2.92164 |                          | C  | -5.05788 | -0.87081 | -0.00007 |
|                         | C  | 8.36662 | 5.58037  | -1.98447 |                          | C  | -3.87604 | -1.58099 | 0.00008  |
|                         | C  | 8.12019 | 4.24020  | -2.31883 |                          | C  | -2.63819 | -0.88839 | 0.00019  |
|                         | C  | 7.63276 | 3.91642  | -3.59281 |                          | C  | -2.66462 | 0.53270  | 0.00014  |
|                         | O  | 7.38808 | 2.64065  | -3.93922 |                          | O  | -1.51470 | 1.24958  | 0.00025  |
|                         | C  | 7.58807 | 1.55365  | -3.09531 |                          | C  | -0.24110 | 0.67196  | 0.00052  |
|                         | C  | 8.09717 | 1.85942  | -1.75624 |                          | C  | -0.18666 | -0.76003 | 0.00039  |
|                         | C  | 8.34047 | 3.15265  | -1.41827 |                          | C  | -1.38384 | -1.50896 | 0.00028  |
|                         | H  | 7.45135 | 7.03340  | -4.91927 |                          | H  | -6.02807 | 1.06511  | -0.00024 |
|                         | H  | 8.74400 | 5.82958  | -0.99776 |                          | H  | -3.87991 | -2.66576 | 0.00010  |
|                         | H  | 8.71799 | 3.34491  | -0.41619 |                          | H  | -1.31120 | -2.59113 | 0.00022  |
|                         | C  | 8.38067 | 0.82132  | -0.69247 |                          | C  | 1.06771  | -1.50261 | 0.00033  |
|                         | O  | 8.80677 | 1.22868  | 0.38853  |                          | O  | 1.09454  | -2.73345 | 0.00015  |
|                         | O  | 7.31768 | 0.47683  | -3.56592 |                          | O  | 0.67053  | 1.48424  | 0.00018  |
|                         | C  | 8.14753 | -0.58821 | -0.97155 |                          | C  | 2.39825  | -0.78408 | 0.00027  |
|                         | H  | 7.77123 | -0.85794 | -1.94988 |                          | H  | 2.37025  | 0.29984  | 0.00035  |
|                         | C  | 8.40537 | -1.50955 | -0.01002 |                          | C  | 3.53833  | -1.49879 | 0.00011  |
|                         | H  | 8.78184 | -1.12383 | 0.93824  |                          | H  | 3.45044  | -2.58443 | 0.00004  |
|                         | C  | 8.24157 | -2.93900 | -0.09048 |                          | C  | 4.87875  | -0.94354 | 0.00004  |
|                         | C  | 8.56562 | -3.73515 | 1.02272  |                          | C  | 5.98802  | -1.81774 | -0.00012 |
|                         | C  | 7.76767 | -3.60896 | -1.23556 |                          | C  | 5.14501  | 0.44669  | 0.00012  |
|                         | C  | 8.43130 | -5.10946 | 1.00995  |                          | C  | 7.28163  | -1.35220 | -0.00020 |
|                         | C  | 7.62644 | -4.97958 | -1.26857 |                          | C  | 6.42822  | 0.93286  | 0.00005  |
|                         | C  | 7.95498 | -5.77628 | -0.14270 |                          | C  | 7.54283  | 0.04628  | -0.00012 |
|                         | H  | 8.93481 | -3.25120 | 1.92478  |                          | H  | 5.81012  | -2.88980 | -0.00018 |
|                         | H  | 7.50343 | -3.03898 | -2.12242 |                          | H  | 4.32053  | 1.15256  | 0.00025  |
|                         | H  | 8.69681 | -5.67123 | 1.89819  |                          | H  | 8.09838  | -2.06406 | -0.00032 |
|                         | N  | 7.81603 | -7.13481 | -0.17252 |                          | N  | 8.81248  | 0.52101  | -0.00020 |
|                         | C  | 7.32673 | -7.78974 | -1.36463 |                          | C  | 9.06565  | 1.95095  | -0.00008 |
|                         | H  | 7.98348 | -7.60995 | -2.22644 |                          | H  | 8.63850  | 2.42461  | 0.89105  |
|                         | H  | 7.28726 | -8.86589 | -1.19149 |                          | H  | 10.14073 | 2.12390  | -0.00014 |
|                         | H  | 6.31522 | -7.45250 | -1.62822 |                          | H  | 8.63838  | 2.42477  | -0.89108 |
|                         | C  | 8.15848 | -7.92237 | 0.98977  |                          | C  | 9.94179  | -0.39163 | -0.00038 |
|                         | H  | 7.54800 | -7.64797 | 1.86077  |                          | H  | 9.93039  | -1.02928 | -0.89164 |
|                         | H  | 7.98146 | -8.97673 | 0.77387  |                          | H  | 10.86655 | 0.18329  | -0.00047 |
|                         | H  | 9.21611 | -7.80553 | 1.26253  |                          | H  | 9.93060  | -1.02938 | 0.89081  |
|                         | H  | 7.25721 | -5.44418 | -2.17582 |                          | H  | 6.58150  | 2.00536  | 0.00011  |
|                         | Br | 6.74036 | 4.49280  | -6.23305 |                          | Br | -3.88965 | 3.09707  | -0.00009 |
|                         | Br | 8.44787 | 8.37309  | -2.49315 |                          | Br | -6.70557 | -1.81057 | -0.00022 |

|                         |    |          |          |          |                          |    |          |          |          |
|-------------------------|----|----------|----------|----------|--------------------------|----|----------|----------|----------|
| <b>T6(ground state)</b> | H  | 6.33252  | 4.63909  | -5.20053 | <b>T6(excited state)</b> | H  | -6.75142 | -2.69453 | -0.00008 |
|                         | C  | 6.94784  | 4.91340  | -4.34953 |                          | C  | -6.72457 | -1.60883 | -0.00005 |
|                         | C  | 7.32448  | 6.22654  | -4.10806 |                          | C  | -7.89722 | -0.84800 | -0.00008 |
|                         | C  | 8.11999  | 6.55972  | -3.00261 |                          | C  | -7.82017 | 0.55002  | -0.00003 |
|                         | C  | 8.54031  | 5.56975  | -2.13404 |                          | C  | -6.59218 | 1.18599  | 0.00004  |
|                         | C  | 8.17285  | 4.23054  | -2.35545 |                          | C  | -5.38338 | 0.44263  | 0.00010  |
|                         | C  | 7.37656  | 3.92402  | -3.46857 |                          | C  | -5.49727 | -0.97086 | 0.00005  |
|                         | O  | 6.99996  | 2.64855  | -3.71917 |                          | O  | -4.37924 | -1.75764 | 0.00013  |
|                         | C  | 7.35193  | 1.56746  | -2.93031 |                          | C  | -3.08520 | -1.25779 | 0.00044  |
|                         | C  | 8.18363  | 1.85898  | -1.76072 |                          | C  | -2.94032 | 0.17327  | 0.00013  |
|                         | C  | 8.55812  | 3.14508  | -1.51587 |                          | C  | -4.09592 | 0.99319  | 0.00007  |
|                         | H  | 6.99556  | 7.00674  | -4.78911 |                          | H  | -8.86248 | -1.34535 | -0.00015 |
|                         | H  | 8.40402  | 7.59360  | -2.83117 |                          | H  | -8.73234 | 1.14125  | -0.00008 |
|                         | H  | 9.15752  | 5.80870  | -1.27159 |                          | H  | -6.53105 | 2.27153  | 0.00005  |
|                         | H  | 9.17584  | 3.32602  | -0.63851 |                          | H  | -3.95682 | 2.06878  | -0.00009 |
|                         | C  | 8.66985  | 0.81951  | -0.78176 |                          | C  | -1.65480 | 0.83669  | -0.00019 |
|                         | O  | 9.36345  | 1.20323  | 0.15909  |                          | O  | -1.53876 | 2.06768  | 0.00002  |
|                         | O  | 6.93036  | 0.49503  | -3.29769 |                          | O  | -2.21775 | -2.12223 | -0.00030 |
|                         | C  | 8.31341  | -0.58593 | -0.97048 |                          | C  | -0.37497 | 0.03321  | -0.00013 |
|                         | H  | 7.69910  | -0.83691 | -1.82556 |                          | H  | -0.48145 | -1.04615 | -0.00013 |
|                         | C  | 8.75832  | -1.50510 | -0.08253 |                          | C  | 0.81291  | 0.67656  | -0.00012 |
|                         | H  | 9.36868  | -1.12903 | 0.73614  |                          | H  | 0.78760  | 1.76303  | -0.00013 |
|                         | C  | 8.51008  | -2.92812 | -0.10554 |                          | C  | 2.10122  | 0.02332  | -0.00008 |
|                         | C  | 9.01995  | -3.80749 | 0.86965  |                          | C  | 3.32306  | 0.75148  | -0.00002 |
|                         | C  | 7.73493  | -3.54024 | -1.11245 |                          | C  | 2.22810  | -1.39006 | -0.00009 |
|                         | C  | 8.78804  | -5.17015 | 0.85627  |                          | C  | 4.55270  | 0.13393  | 0.00001  |
|                         | C  | 7.48432  | -4.89296 | -1.15617 |                          | C  | 3.43840  | -2.03021 | -0.00005 |
|                         | C  | 8.00817  | -5.75626 | -0.16406 |                          | C  | 4.64932  | -1.28164 | -0.00000 |
|                         | H  | 9.21702  | -5.77576 | 1.64401  |                          | H  | 5.44224  | 0.75035  | 0.00006  |
|                         | N  | 7.77231  | -7.09983 | -0.18803 |                          | N  | 5.85532  | -1.89662 | 0.00003  |
|                         | C  | 6.96981  | -7.67487 | -1.24459 |                          | C  | 5.94272  | -3.34674 | 0.00008  |
|                         | H  | 7.41634  | -7.50339 | -2.23313 |                          | H  | 5.46480  | -3.76836 | -0.89130 |
|                         | H  | 6.89617  | -8.75216 | -1.09150 |                          | H  | 6.99112  | -3.64085 | 0.00012  |
|                         | H  | 5.95153  | -7.26369 | -1.25101 |                          | H  | 5.46474  | -3.76830 | 0.89145  |
|                         | C  | 8.32380  | -7.95064 | 0.84229  |                          | C  | 7.08100  | -1.11804 | 0.00006  |
|                         | H  | 7.95641  | -7.67121 | 1.83897  |                          | H  | 7.14184  | -0.48340 | 0.89155  |
|                         | H  | 8.02739  | -8.98271 | 0.65178  |                          | H  | 7.93446  | -1.79419 | -0.00002 |
|                         | H  | 9.42134  | -7.91070 | 0.85705  |                          | H  | 7.14179  | -0.48325 | -0.89133 |
|                         | H  | 6.87850  | -5.28708 | -1.96371 |                          | H  | 3.45926  | -3.11318 | -0.00007 |
|                         | H  | 7.31311  | -2.91513 | -1.89427 |                          | H  | 1.32613  | -1.99273 | -0.00013 |
|                         | Br | 10.08532 | -3.15567 | 2.29985  |                          | Br | 3.31085  | 2.63488  | 0.00001  |

|                           |    |         |          |          |                            |    |          |          |          |
|---------------------------|----|---------|----------|----------|----------------------------|----|----------|----------|----------|
| <b>T6a</b> (ground state) | H  | 6.45441 | 5.05162  | -5.11932 | <b>T6a</b> (excited state) | H  | -6.45715 | -2.39338 | 0.00018  |
|                           | C  | 7.07031 | 5.22186  | -4.24195 |                            | C  | -6.47838 | -1.30754 | 0.00012  |
|                           | C  | 7.51331 | 6.48841  | -3.88981 |                            | C  | -7.68359 | -0.59939 | 0.00012  |
|                           | C  | 8.30833 | 6.68676  | -2.75207 |                            | C  | -7.66820 | 0.80065  | 0.00005  |
|                           | C  | 8.66106 | 5.60792  | -1.96284 |                            | C  | -6.46929 | 1.49001  | -0.00001 |
|                           | C  | 8.22548 | 4.31332  | -2.29708 |                            | C  | -5.22874 | 0.80090  | -0.00001 |
|                           | C  | 7.43120 | 4.14191  | -3.44029 |                            | C  | -5.28020 | -0.61629 | 0.00006  |
|                           | O  | 6.99055 | 2.91405  | -3.79836 |                            | O  | -4.12900 | -1.35279 | 0.00006  |
|                           | C  | 7.27159 | 1.75328  | -3.09616 |                            | C  | -2.85669 | -0.79702 | -0.00004 |
|                           | C  | 8.09985 | 1.90408  | -1.89715 |                            | C  | -2.77523 | 0.64021  | -0.00007 |
|                           | C  | 8.53871 | 3.14390  | -1.54466 |                            | C  | -3.96678 | 1.40773  | -0.00006 |
|                           | H  | 7.23749 | 7.33810  | -4.50844 |                            | H  | -8.62592 | -1.13893 | 0.00017  |
|                           | H  | 8.64496 | 7.68618  | -2.49350 |                            | H  | -8.60551 | 1.35118  | 0.00005  |
|                           | H  | 9.27678 | 5.74188  | -1.07691 |                            | H  | -6.45618 | 2.57724  | -0.00006 |
|                           | H  | 9.15160 | 3.22015  | -0.64885 |                            | H  | -3.87588 | 2.48842  | -0.00010 |
|                           | C  | 8.51417 | 0.76414  | -1.00105 |                            | C  | -1.52182 | 1.35907  | -0.00010 |
|                           | O  | 9.21296 | 1.03508  | -0.02469 |                            | O  | -1.46412 | 2.59554  | -0.00009 |
|                           | O  | 6.79923 | 0.73979  | -3.55395 |                            | O  | -1.95296 | -1.62115 | 0.00009  |
|                           | C  | 8.08364 | -0.60228 | -1.30985 |                            | C  | -0.20437 | 0.61011  | -0.00006 |
|                           | H  | 7.47215 | -0.75151 | -2.18573 |                            | H  | -0.25703 | -0.46926 | -0.00006 |
|                           | C  | 8.47889 | -1.59489 | -0.47784 |                            | C  | 0.93661  | 1.33695  | -0.00004 |
|                           | H  | 9.09404 | -1.25625 | 0.35724  |                            | H  | 0.78293  | 2.41621  | -0.00004 |
|                           | C  | 8.25135 | -3.02399 | -0.46840 |                            | C  | 2.32411  | 0.93376  | -0.00001 |
|                           | C  | 8.84899 | -3.73476 | 0.59688  |                            | C  | 3.26565  | 2.00000  | 0.00004  |
|                           | C  | 7.51715 | -3.82656 | -1.36787 |                            | C  | 2.88954  | -0.37478 | -0.00003 |
|                           | C  | 8.74482 | -5.09639 | 0.77399  |                            | C  | 4.62311  | 1.82293  | 0.00006  |
|                           | C  | 7.39350 | -5.19591 | -1.21794 |                            | C  | 4.25237  | -0.57813 | 0.00000  |
|                           | C  | 8.00371 | -5.87629 | -0.14134 |                            | C  | 5.16386  | 0.50795  | 0.00004  |
|                           | H  | 9.42683 | -3.16276 | 1.31937  |                            | H  | 2.87125  | 3.01214  | 0.00005  |
|                           | H  | 9.23805 | -5.55628 | 1.62226  |                            | H  | 5.27081  | 2.69110  | 0.00011  |
|                           | N  | 7.87801 | -7.22744 | 0.00106  |                            | N  | 6.50090  | 0.29490  | 0.00006  |
|                           | C  | 7.11075 | -7.99129 | -0.95696 |                            | C  | 7.03395  | -1.05603 | 0.00013  |
|                           | H  | 7.52660 | -7.90723 | -1.97003 |                            | H  | 6.70935  | -1.60483 | -0.89124 |
|                           | H  | 7.12907 | -9.04401 | -0.67258 |                            | H  | 8.12186  | -1.01129 | 0.00018  |
|                           | H  | 6.06172 | -7.66744 | -0.98803 |                            | H  | 6.70926  | -1.60478 | 0.89149  |
|                           | C  | 8.51419 | -7.89640 | 1.11353  |                            | C  | 7.42419  | 1.41637  | 0.00008  |
|                           | H  | 8.13965 | -7.52695 | 2.07765  |                            | H  | 7.28538  | 2.03818  | 0.89164  |
|                           | H  | 8.30213 | -8.96474 | 1.05763  |                            | H  | 8.44522  | 1.03808  | -0.00005 |
|                           | H  | 9.60464 | -7.76638 | 1.09584  |                            | H  | 7.28522  | 2.03832  | -0.89135 |
|                           | H  | 6.81228 | -5.73817 | -1.95271 |                            | H  | 4.61403  | -1.59822 | -0.00002 |
|                           | Br | 6.62662 | -3.10248 | -2.87344 |                            | Br | 1.83897  | -1.93292 | -0.00010 |

|                  |         |          |          |          |                   |         |          |          |          |
|------------------|---------|----------|----------|----------|-------------------|---------|----------|----------|----------|
| T7(ground state) | H       | 6.79826  | 4.70669  | -5.39075 | T7(excited state) | H       | 6.41190  | -2.82603 | 0.48595  |
|                  | C       | 7.27133  | 4.96624  | -4.44903 |                   | C       | 6.58246  | -1.76760 | 0.31258  |
|                  | C       | 7.58958  | 6.27649  | -4.12305 |                   | C       | 7.87342  | -1.24058 | 0.21760  |
|                  | C       | 8.20078  | 6.59091  | -2.90085 |                   | C       | 8.05101  | 0.13010  | -0.00624 |
|                  | C       | 8.49437  | 5.58482  | -1.99967 |                   | C       | 6.95854  | 0.96824  | -0.13483 |
|                  | C       | 8.18233  | 4.24784  | -2.30488 |                   | C       | 5.63510  | 0.46457  | -0.04412 |
|                  | C       | 7.57151  | 3.96025  | -3.53454 |                   | C       | 5.49107  | -0.92749 | 0.18339  |
|                  | O       | 7.25469  | 2.68791  | -3.86912 |                   | O       | 4.24912  | -1.48973 | 0.28417  |
|                  | C       | 7.49381  | 1.59194  | -3.06006 |                   | C       | 3.06739  | -0.77115 | 0.18197  |
|                  | C       | 8.12771  | 1.86406  | -1.76805 |                   | C       | 3.18395  | 0.64368  | -0.05749 |
|                  | C       | 8.44559  | 3.14708  | -1.43932 |                   | C       | 4.46860  | 1.23092  | -0.16103 |
|                  | H       | 7.35979  | 7.06961  | -4.82934 |                   | H       | 8.73249  | -1.89708 | 0.31795  |
|                  | H       | 8.44171  | 7.62304  | -2.66513 |                   | H       | 9.05519  | 0.53973  | -0.07988 |
|                  | H       | 8.96779  | 5.80895  | -1.04705 |                   | H       | 7.09523  | 2.03276  | -0.30882 |
|                  | H       | 8.91747  | 3.31397  | -0.47314 |                   | H       | 4.52608  | 2.29971  | -0.33625 |
|                  | C       | 8.46300  | 0.80571  | -0.75079 |                   | C       | 2.03976  | 1.51492  | -0.19568 |
|                  | O       | 9.01368  | 1.16225  | 0.28872  |                   | O       | 2.14835  | 2.73264  | -0.38948 |
|                  | O       | 7.15285  | 0.52348  | -3.51153 |                   | O       | 2.05739  | -1.44936 | 0.31162  |
|                  | C       | 8.12910  | -0.59880 | -1.01135 |                   | C       | 0.63540  | 0.96138  | -0.13389 |
|                  | H       | 7.64937  | -0.83814 | -1.95218 |                   | H       | 0.53258  | -0.11840 | -0.09728 |
|                  | C       | 8.42816  | -1.53196 | -0.08315 |                   | C       | -0.41192 | 1.80734  | -0.12114 |
|                  | H       | 8.91606  | -1.17947 | 0.82591  |                   | H       | -0.19792 | 2.87474  | -0.14359 |
|                  | C       | 8.17695  | -2.95899 | -0.15542 |                   | C       | -1.80616 | 1.41129  | -0.05436 |
|                  | C       | 8.58023  | -3.78435 | 0.90222  |                   | C       | -2.80483 | 2.39818  | 0.10023  |
|                  | C       | 7.52352  | -3.56863 | -1.23975 |                   | C       | -2.23086 | 0.07135  | -0.15624 |
|                  | C       | 8.37352  | -5.15379 | 0.86730  |                   | C       | -4.13269 | 2.06448  | 0.19702  |
|                  | C       | 7.30103  | -4.93136 | -1.26026 |                   | C       | -3.56091 | -0.27631 | -0.06679 |
|                  | C       | 7.74218  | -5.78143 | -0.21917 |                   | C       | -4.56940 | 0.71165  | 0.16118  |
|                  | H       | 9.08326  | -3.34241 | 1.75922  |                   | H       | -2.50959 | 3.44096  | 0.17426  |
|                  | H       | 7.15370  | -2.96937 | -2.06555 |                   | H       | -1.50640 | -0.71265 | -0.34883 |
|                  | N       | 7.50979  | -7.15765 | -0.24598 |                   | N       | -5.89245 | 0.43535  | 0.33074  |
|                  | C       | 8.18271  | -7.92445 | -1.28554 |                   | C       | -6.39986 | -0.74025 | 1.01918  |
|                  | H       | 8.15934  | -7.39450 | -2.23746 |                   | H       | -5.60707 | -1.24712 | 1.56541  |
|                  | H       | 9.23341  | -8.12702 | -1.01931 |                   | H       | -7.15990 | -0.40490 | 1.73401  |
|                  | H       | 7.66705  | -8.88133 | -1.41745 |                   | H       | -6.86182 | -1.44434 | 0.31889  |
|                  | C       | 7.52193  | -7.85126 | 1.02363  |                   | C       | -6.89543 | 1.44952  | 0.06978  |
|                  | H       | 6.92767  | -7.30197 | 1.75868  |                   | H       | -6.59888 | 2.07742  | -0.77150 |
|                  | H       | 7.06571  | -8.83635 | 0.88148  |                   | H       | -7.83034 | 0.94486  | -0.18810 |
|                  | H       | 8.53607  | -8.00860 | 1.43078  |                   | H       | -7.07781 | 2.07744  | 0.95298  |
|                  | Br      | 6.28268  | -5.62129 | -2.70035 |                   | Br      | -3.98808 | -2.07161 | -0.44238 |
| H                | 8.72770 | -5.76056 | 1.69418  | H        | -4.86040          | 2.84795 | 0.37572  |          |          |



|                           |    |         |          |          |                            |    |          |          |          |
|---------------------------|----|---------|----------|----------|----------------------------|----|----------|----------|----------|
| <b>T7a</b> (ground state) | H  | 6.78155 | 4.53847  | -5.45780 | <b>T7a</b> (excited state) | H  | 6.08609  | 0.67889  | -2.91837 |
|                           | C  | 7.20442 | 4.84127  | -4.50517 |                            | C  | 6.35612  | 0.26663  | -1.95062 |
|                           | C  | 7.44429 | 6.17256  | -4.19763 |                            | C  | 7.64944  | -0.19000 | -1.68607 |
|                           | C  | 7.99146 | 6.54319  | -2.96091 |                            | C  | 7.95179  | -0.71158 | -0.42396 |
|                           | C  | 8.30009 | 5.57242  | -2.02663 |                            | C  | 6.98245  | -0.77921 | 0.56121  |
|                           | C  | 8.06705 | 4.21521  | -2.31265 |                            | C  | 5.66015  | -0.32525 | 0.32778  |
|                           | C  | 7.51879 | 3.87126  | -3.55720 |                            | C  | 5.39168  | 0.20026  | -0.96295 |
|                           | O  | 7.27824 | 2.57759  | -3.87362 |                            | O  | 4.13923  | 0.67824  | -1.29037 |
|                           | C  | 7.54082 | 1.51256  | -3.03132 |                            | C  | 3.10413  | 0.64519  | -0.40260 |
|                           | C  | 8.11466 | 1.84315  | -1.72513 |                            | C  | 3.33274  | 0.10027  | 0.89706  |
|                           | C  | 8.35330 | 3.14755  | -1.41366 |                            | C  | 4.61318  | -0.37232 | 1.26485  |
|                           | H  | 7.20278 | 6.93798  | -4.93008 |                            | H  | 8.41039  | -0.13610 | -2.45836 |
|                           | H  | 8.17140 | 7.59092  | -2.74006 |                            | H  | 8.95673  | -1.06801 | -0.21290 |
|                           | H  | 8.72498 | 5.84016  | -1.06246 |                            | H  | 7.21983  | -1.18775 | 1.54036  |
|                           | H  | 8.77958 | 3.35824  | -0.43491 |                            | H  | 4.76703  | -0.77710 | 2.25924  |
|                           | C  | 8.46962 | 0.82485  | -0.67376 |                            | C  | 2.21495  | 0.11642  | 1.76989  |
|                           | O  | 8.94097 | 1.23322  | 0.38531  |                            | O  | 2.18471  | -0.21026 | 2.96832  |
|                           | O  | 7.26551 | 0.41932  | -3.46892 |                            | O  | 2.03203  | 1.11160  | -0.79546 |
|                           | C  | 8.25242 | -0.60300 | -0.92933 |                            | C  | 0.90249  | 0.62297  | 1.23135  |
|                           | H  | 7.83523 | -0.88649 | -1.88738 |                            | H  | 0.71881  | 1.68783  | 1.35986  |
|                           | C  | 8.57604 | -1.50348 | 0.02270  |                            | C  | -0.12846 | -0.21745 | 0.90215  |
|                           | H  | 8.99160 | -1.10874 | 0.95013  |                            | H  | 0.07185  | -1.28669 | 0.88500  |
|                           | C  | 8.43074 | -2.94539 | -0.05095 |                            | C  | -1.45413 | 0.18809  | 0.58177  |
|                           | C  | 8.84591 | -3.72254 | 1.04084  |                            | C  | -2.42772 | -0.80145 | 0.29907  |
|                           | C  | 7.90766 | -3.62148 | -1.16389 |                            | C  | -1.87247 | 1.54212  | 0.49178  |
|                           | C  | 8.74148 | -5.10246 | 1.02412  |                            | C  | -3.72728 | -0.48529 | -0.00990 |
|                           | C  | 7.78635 | -4.99859 | -1.16674 |                            | C  | -3.16448 | 1.86540  | 0.18520  |
|                           | C  | 8.18338 | -5.79167 | -0.07230 |                            | C  | -4.16821 | 0.87587  | -0.03603 |
|                           | H  | 9.28639 | -3.23865 | 1.90805  |                            | H  | -2.12716 | -1.84446 | 0.28848  |
|                           | H  | 7.57279 | -3.06228 | -2.03291 |                            | H  | -1.16540 | 2.34208  | 0.68247  |
|                           | N  | 8.07895 | -7.18357 | -0.09429 |                            | N  | -5.44658 | 1.26620  | -0.26395 |
|                           | C  | 7.98804 | -7.81731 | -1.39191 |                            | C  | -5.73663 | 2.61255  | -0.72472 |
|                           | H  | 8.74070 | -7.40267 | -2.06768 |                            | H  | -4.96168 | 2.96156  | -1.40861 |
|                           | H  | 8.19190 | -8.88584 | -1.26742 |                            | H  | -6.68459 | 2.58674  | -1.26814 |
|                           | H  | 6.99400 | -7.71970 | -1.86217 |                            | H  | -5.83727 | 3.31803  | 0.11082  |
|                           | C  | 7.17804 | -7.79823 | 0.87101  |                            | C  | -6.62119 | 0.52630  | 0.17465  |
|                           | H  | 7.26457 | -7.31797 | 1.84540  |                            | H  | -6.35247 | -0.24535 | 0.89296  |
|                           | H  | 6.12865 | -7.73638 | 0.53816  |                            | H  | -7.29499 | 1.23633  | 0.66644  |
|                           | H  | 7.44320 | -8.85406 | 0.98887  |                            | H  | -7.14529 | 0.06668  | -0.66934 |
|                           | H  | 7.35143 | -5.48336 | -2.03474 |                            | H  | -3.45161 | 2.91036  | 0.17384  |
|                           | Br | 9.46796 | -6.04738 | 2.49555  |                            | Br | -4.83095 | -1.90915 | -0.57358 |

|                         |         |          |          |          |                          |          |          |          |          |
|-------------------------|---------|----------|----------|----------|--------------------------|----------|----------|----------|----------|
| <b>T8(ground state)</b> | H       | -6.17914 | -2.61008 | -0.19592 | <b>T8(excited state)</b> | H        | -6.72786 | -1.87421 | 1.98096  |
|                         | C       | -6.15428 | -1.52734 | -0.12445 |                          | C        | -6.75459 | -1.05822 | 1.26480  |
|                         | C       | -7.31380 | -0.76707 | -0.08038 |                          | C        | -7.96029 | -0.49137 | 0.84590  |
|                         | C       | -7.26006 | 0.63098  | 0.01224  |                          | C        | -7.95137 | 0.55967  | -0.07917 |
|                         | C       | -6.03550 | 1.27043  | 0.06087  |                          | C        | -6.75678 | 1.04241  | -0.58216 |
|                         | C       | -4.84455 | 0.52371  | 0.01788  |                          | C        | -5.51624 | 0.48818  | -0.17762 |
|                         | C       | -4.92582 | -0.87372 | -0.07472 |                          | C        | -5.56134 | -0.57288 | 0.75891  |
|                         | O       | -3.80541 | -1.63097 | -0.11842 |                          | O        | -4.40719 | -1.15888 | 1.19820  |
|                         | C       | -2.52065 | -1.11675 | -0.07674 |                          | C        | -3.14162 | -0.77823 | 0.78484  |
|                         | C       | -2.40741 | 0.34047  | 0.01492  |                          | C        | -3.06472 | 0.29756  | -0.17699 |
|                         | C       | -3.53991 | 1.09542  | 0.06169  |                          | C        | -4.25673 | 0.90524  | -0.63344 |
|                         | H       | -8.27777 | -1.26711 | -0.11846 |                          | H        | -8.89915 | -0.86869 | 1.23994  |
|                         | H       | -8.17939 | 1.20777  | 0.04553  |                          | H        | -8.88997 | 1.00054  | -0.40502 |
|                         | H       | -5.97347 | 2.35342  | 0.13271  |                          | H        | -6.74851 | 1.85842  | -1.30065 |
|                         | H       | -3.41982 | 2.17437  | 0.13551  |                          | H        | -4.17177 | 1.71184  | -1.35344 |
|                         | C       | -1.09935 | 1.08396  | 0.06979  |                          | C        | -1.81827 | 0.80380  | -0.69156 |
|                         | O       | -1.13970 | 2.30460  | 0.20450  |                          | O        | -1.76504 | 1.73250  | -1.51618 |
|                         | O       | -1.62874 | -1.93089 | -0.11787 |                          | O        | -2.23406 | -1.41412 | 1.29786  |
|                         | C       | 0.17025  | 0.35209  | -0.04442 |                          | C        | -0.50833 | 0.18623  | -0.28578 |
|                         | H       | 0.12872  | -0.71172 | -0.22609 |                          | H        | -0.53529 | -0.69614 | 0.34330  |
|                         | C       | 1.31787  | 1.04150  | 0.12753  |                          | C        | 0.63068  | 0.75427  | -0.72227 |
|                         | H       | 1.19473  | 2.09291  | 0.38124  |                          | H        | 0.54478  | 1.67931  | -1.29180 |
|                         | C       | 2.69377  | 0.57927  | 0.08062  |                          | C        | 1.96088  | 0.29308  | -0.36916 |
|                         | C       | 3.68715  | 1.25182  | 0.83017  |                          | C        | 2.95494  | 1.22151  | 0.04733  |
|                         | C       | 3.20029  | -0.49341 | -0.68665 |                          | C        | 2.38801  | -1.06335 | -0.42481 |
|                         | C       | 5.02047  | 0.89787  | 0.85810  |                          | C        | 4.23016  | 0.85696  | 0.40580  |
|                         | C       | 4.52926  | -0.87293 | -0.69323 |                          | C        | 3.65448  | -1.45969 | -0.06094 |
|                         | C       | 5.48159  | -0.19286 | 0.09303  |                          | C        | 4.61168  | -0.50854 | 0.37257  |
|                         | H       | 5.69629  | 1.46974  | 1.48009  |                          | H        | 4.92116  | 1.62380  | 0.73045  |
|                         | N       | 6.79208  | -0.56900 | 0.10707  |                          | N        | 5.85932  | -0.89203 | 0.73579  |
|                         | C       | 7.23322  | -1.68335 | -0.70199 |                          | C        | 6.21996  | -2.29894 | 0.76712  |
|                         | H       | 7.08409  | -1.49560 | -1.77422 |                          | H        | 6.22410  | -2.72596 | -0.24285 |
|                         | H       | 8.29799  | -1.84782 | -0.53325 |                          | H        | 7.21764  | -2.40181 | 1.19084  |
|                         | H       | 6.70319  | -2.60729 | -0.43673 |                          | H        | 5.51926  | -2.86437 | 1.38969  |
|                         | C       | 7.74916  | 0.17862  | 0.89179  |                          | C        | 6.85949  | 0.09628  | 1.10061  |
|                         | H       | 7.49522  | 0.16347  | 1.95995  |                          | H        | 6.57715  | 0.61804  | 2.02264  |
|                         | H       | 8.73577  | -0.27112 | 0.77548  |                          | H        | 7.81236  | -0.40445 | 1.26412  |
|                         | H       | 7.81325  | 1.22613  | 0.56730  |                          | H        | 6.98822  | 0.83209  | 0.30016  |
|                         | H       | 4.82274  | -1.69842 | -1.32816 |                          | H        | 3.91014  | -2.50809 | -0.13965 |
|                         | Br      | 3.21063  | 2.72539  | 1.92795  |                          | Br       | 2.51095  | 3.04486  | 0.15382  |
| Br                      | 2.09163 | -1.47788 | -1.86500 | Br       | 1.23684                  | -2.40646 | -1.05617 |          |          |

**Table S3.** The Cartesian Coordinates (in Å) of species studied, optimized with CAM-B3LYP+IDSCRF/6-31G(d).

| Compounds                | Cartesian coordinates |          |          |          | Species                   | Cartesian coordinates |          |          |          |
|--------------------------|-----------------------|----------|----------|----------|---------------------------|-----------------------|----------|----------|----------|
| <b>T1</b> (ground state) | H                     | 7.01688  | 4.63849  | -5.50505 | <b>T1</b> (excited state) | H                     | -5.89301 | 2.73422  | -0.00007 |
|                          | C                     | 7.39375  | 4.92233  | -4.52886 |                           | C                     | -5.95149 | 1.65106  | -0.00006 |
|                          | C                     | 7.63986  | 6.24225  | -4.19113 |                           | C                     | -7.17018 | 0.98267  | -0.00018 |
|                          | C                     | 8.12682  | 6.58331  | -2.92300 |                           | C                     | -7.20381 | -0.41646 | -0.00018 |
|                          | C                     | 8.36747  | 5.59426  | -1.99045 |                           | C                     | -6.02886 | -1.14229 | -0.00005 |
|                          | C                     | 8.12595  | 4.24858  | -2.30858 |                           | C                     | -4.77692 | -0.49156 | 0.00011  |
|                          | C                     | 7.64044  | 3.93572  | -3.58012 |                           | C                     | -4.77873 | 0.91399  | 0.00010  |
|                          | O                     | 7.39325  | 2.64611  | -3.92881 |                           | O                     | -3.59874 | 1.60495  | 0.00026  |
|                          | C                     | 7.59180  | 1.56733  | -3.09013 |                           | C                     | -2.35529 | 1.00931  | 0.00071  |
|                          | C                     | 8.10196  | 1.87012  | -1.74727 |                           | C                     | -2.32248 | -0.44987 | 0.00030  |
|                          | C                     | 8.34561  | 3.15864  | -1.40801 |                           | C                     | -3.52364 | -1.14838 | 0.00013  |
|                          | H                     | 7.45152  | 7.02199  | -4.92247 |                           | H                     | -8.09486 | 1.55056  | -0.00030 |
|                          | H                     | 8.31376  | 7.62294  | -2.67624 |                           | H                     | -8.15828 | -0.93367 | -0.00030 |
|                          | H                     | 8.74505  | 5.84046  | -1.00237 |                           | H                     | -6.04910 | -2.22824 | -0.00008 |
|                          | H                     | 8.72252  | 3.35060  | -0.40749 |                           | H                     | -3.47317 | -2.23067 | -0.00008 |
|                          | C                     | 8.38156  | 0.82543  | -0.69158 |                           | C                     | -1.09421 | -1.22978 | -0.00003 |
|                          | O                     | 8.80719  | 1.21833  | 0.39174  |                           | O                     | -1.12680 | -2.47907 | -0.00021 |
|                          | O                     | 7.32327  | 0.48501  | -3.55338 |                           | O                     | -1.41961 | 1.78596  | -0.00019 |
|                          | C                     | 8.14752  | -0.59274 | -0.96996 |                           | C                     | 0.21337  | -0.55865 | -0.00007 |
|                          | H                     | 7.77194  | -0.86052 | -1.94683 |                           | H                     | 0.22526  | 0.52250  | -0.00009 |
|                          | C                     | 8.40460  | -1.50511 | -0.01234 |                           | C                     | 1.36655  | -1.30804 | -0.00010 |
|                          | H                     | 8.78069  | -1.12158 | 0.93488  |                           | H                     | 1.24549  | -2.38777 | -0.00005 |
|                          | C                     | 8.23990  | -2.94432 | -0.09163 |                           | C                     | 2.68613  | -0.78190 | -0.00012 |
|                          | C                     | 8.56401  | -3.73672 | 1.01717  |                           | C                     | 3.80022  | -1.66918 | 0.00009  |
|                          | C                     | 7.76615  | -3.61028 | -1.23280 |                           | C                     | 2.98087  | 0.61425  | -0.00032 |
|                          | C                     | 8.42938  | -5.11172 | 1.00412  |                           | C                     | 5.08988  | -1.21965 | 0.00012  |
|                          | C                     | 7.62435  | -4.98129 | -1.26664 |                           | C                     | 4.26579  | 1.07851  | -0.00027 |
|                          | C                     | 7.95307  | -5.77643 | -0.14470 |                           | C                     | 5.37270  | 0.17937  | -0.00004 |
|                          | H                     | 8.93397  | -3.25421 | 1.91839  |                           | H                     | 3.60788  | -2.73779 | 0.00023  |
|                          | H                     | 7.50139  | -3.03987 | -2.11781 |                           | H                     | 2.16689  | 1.33027  | -0.00052 |
|                          | H                     | 8.69562  | -5.67227 | 1.89096  |                           | H                     | 5.89869  | -1.93829 | 0.00029  |
|                          | N                     | 7.81326  | -7.14080 | -0.17477 |                           | N                     | 6.64616  | 0.63552  | 0.00002  |
| C                        | 7.32175               | -7.79553 | -1.36915 | C        | 6.91918                   | 2.06557               | -0.00002 |          |          |
| H                        | 7.97576               | -7.61541 | -2.23164 | H        | 6.50013                   | 2.54769               | 0.88950  |          |          |
| H                        | 7.28233               | -8.87092 | -1.19706 | H        | 7.99603                   | 2.22272               | 0.00016  |          |          |
| H                        | 6.31132               | -7.45853 | -1.63279 | H        | 6.50044                   | 2.54760               | -0.88973 |          |          |
| C                        | 8.15779               | -7.92946 | 0.98930  | C        | 7.76633                   | -0.29453              | 0.00017  |          |          |
| H                        | 7.55023               | -7.65585 | 1.86126  | H        | 7.75036                   | -0.93292              | -0.88949 |          |          |
| H                        | 7.98055               | -8.98291 | 0.77385  | H        | 8.69713                   | 0.26929               | 0.00004  |          |          |
| H                        | 9.21439               | -7.81327 | 1.26210  | H        | 7.75040                   | -0.93260              | 0.89006  |          |          |
| H                        | 7.25439               | -5.44410 | -2.17258 | H        | 4.43535                   | 2.14711               | -0.00043 |          |          |

|                         |    |          |          |          |                           |    |          |          |          |
|-------------------------|----|----------|----------|----------|---------------------------|----|----------|----------|----------|
| <b>T2(ground state)</b> | H  | -4.58951 | 3.77085  | -0.11043 | <b>T2 (excited state)</b> | H  | 4.40623  | 3.80064  | -0.00069 |
|                         | C  | -4.74052 | 2.69850  | -0.06696 |                           | C  | 4.60879  | 2.73546  | -0.00052 |
|                         | C  | -6.00084 | 2.13142  | -0.05119 |                           | C  | 5.90604  | 2.23449  | -0.00049 |
|                         | C  | -6.16779 | 0.74401  | 0.00527  |                           | C  | 6.12400  | 0.85613  | -0.00027 |
|                         | C  | -5.05653 | -0.07130 | 0.04591  |                           | C  | 5.04779  | -0.00815 | -0.00009 |
|                         | C  | -3.75538 | 0.46408  | 0.03184  |                           | C  | 3.71025  | 0.45055  | -0.00012 |
|                         | C  | -3.63413 | 1.85670  | -0.02520 |                           | C  | 3.54514  | 1.85218  | -0.00033 |
|                         | O  | -2.41086 | 2.44131  | -0.04169 |                           | O  | 2.29026  | 2.39326  | -0.00041 |
|                         | C  | -1.21492 | 1.74988  | -0.00554 |                           | C  | 1.12373  | 1.65515  | -0.00006 |
|                         | C  | -1.31753 | 0.28797  | 0.05294  |                           | C  | 1.26827  | 0.20885  | 0.00009  |
|                         | C  | -2.53991 | -0.29237 | 0.07069  |                           | C  | 2.54740  | -0.34807 | 0.00006  |
|                         | H  | -6.87807 | 2.76941  | -0.08299 |                           | H  | 6.75170  | 2.91348  | -0.00064 |
|                         | H  | -7.15987 | 0.30906  | 0.01718  |                           | H  | 7.13194  | 0.45783  | -0.00025 |
|                         | H  | -2.57839 | -1.37530 | 0.11677  |                           | H  | 2.62566  | -1.42637 | 0.00016  |
|                         | C  | -0.12609 | -0.64432 | 0.09736  |                           | C  | 0.14330  | -0.70832 | 0.00028  |
|                         | O  | -0.35712 | -1.84767 | 0.17309  |                           | O  | 0.31051  | -1.94287 | 0.00043  |
|                         | O  | -0.21600 | 2.42579  | -0.02468 |                           | O  | 0.10424  | 2.31931  | 0.00012  |
|                         | C  | 1.23457  | -0.10965 | 0.04436  |                           | C  | -1.24120 | -0.19206 | 0.00035  |
|                         | H  | 1.35568  | 0.96189  | -0.01975 |                           | H  | -1.37881 | 0.88037  | 0.00062  |
|                         | C  | 2.27967  | -0.96028 | 0.07609  |                           | C  | -2.29258 | -1.07181 | 0.00007  |
|                         | H  | 2.04034  | -2.02046 | 0.14294  |                           | H  | -2.04338 | -2.12950 | -0.00031 |
|                         | C  | 3.69141  | -0.63190 | 0.03072  |                           | C  | -3.66710 | -0.70779 | 0.00014  |
|                         | C  | 4.63974  | -1.66236 | 0.07292  |                           | C  | -4.66383 | -1.72361 | -0.00055 |
|                         | C  | 4.18137  | 0.68071  | -0.05616 |                           | C  | -4.12607 | 0.64202  | 0.00088  |
|                         | C  | 5.99813  | -1.41460 | 0.03157  |                           | C  | -5.99832 | -1.43372 | -0.00064 |
|                         | C  | 5.53279  | 0.94964  | -0.09857 |                           | C  | -5.45655 | 0.94860  | 0.00080  |
|                         | C  | 6.48576  | -0.09411 | -0.05539 |                           | C  | -6.44724 | -0.07862 | -0.00005 |
|                         | H  | 4.29568  | -2.69142 | 0.13981  |                           | H  | -4.34330 | -2.76090 | -0.00100 |
|                         | H  | 3.48596  | 1.51369  | -0.09189 |                           | H  | -3.40401 | 1.45057  | 0.00155  |
|                         | H  | 6.68419  | -2.25104 | 0.06656  |                           | H  | -6.71442 | -2.24456 | -0.00109 |
|                         | N  | 7.83107  | 0.16956  | -0.09656 |                           | N  | -7.76392 | 0.22079  | -0.00027 |
|                         | C  | 8.30206  | 1.53496  | -0.20186 |                           | C  | -8.20839 | 1.60833  | 0.00083  |
|                         | H  | 7.97690  | 2.14410  | 0.65064  |                           | H  | -7.85065 | 2.13718  | -0.88846 |
|                         | H  | 9.39170  | 1.53708  | -0.21853 |                           | H  | -9.29620 | 1.63347  | 0.00048  |
|                         | H  | 7.94871  | 2.01997  | -1.12071 |                           | H  | -7.85126 | 2.13560  | 0.89131  |
|                         | C  | 8.78359  | -0.92046 | -0.06785 |                           | C  | -8.76528 | -0.83748 | -0.00119 |
|                         | H  | 8.65636  | -1.59683 | -0.92279 |                           | H  | -8.67304 | -1.46820 | 0.88890  |
|                         | H  | 9.79412  | -0.51447 | -0.10755 |                           | H  | -9.75668 | -0.38906 | -0.00212 |
|                         | H  | 8.69411  | -1.51384 | 0.85067  |                           | H  | -8.67138 | -1.46811 | -0.89113 |
|                         | H  | 5.85658  | 1.98033  | -0.16636 |                           | H  | -5.75377 | 1.98875  | 0.00140  |
|                         | Br | -5.30614 | -1.94670 | 0.12185  |                           | Br | 5.38800  | -1.87734 | 0.00020  |

|                         |    |         |          |          |                          |    |          |          |          |
|-------------------------|----|---------|----------|----------|--------------------------|----|----------|----------|----------|
| <b>T3(ground state)</b> | H  | 7.01578 | 4.64667  | -5.50468 | <b>T3(excited state)</b> | H  | -4.22272 | 3.20050  | -0.00010 |
|                         | C  | 7.39278 | 4.92481  | -4.52706 |                          | C  | -4.33986 | 2.12236  | -0.00006 |
|                         | C  | 7.63663 | 6.24488  | -4.19493 |                          | C  | -5.60043 | 1.53478  | -0.00010 |
|                         | C  | 8.12292 | 6.56929  | -2.92486 |                          | C  | -5.69466 | 0.14289  | -0.00005 |
|                         | C  | 8.36738 | 5.59061  | -1.98575 |                          | C  | -4.57775 | -0.66426 | 0.00004  |
|                         | C  | 8.12426 | 4.24799  | -2.30994 |                          | C  | -3.29108 | -0.08409 | 0.00007  |
|                         | C  | 7.63889 | 3.93520  | -3.58050 |                          | C  | -3.21181 | 1.32112  | 0.00003  |
|                         | O  | 7.39169 | 2.64865  | -3.93084 |                          | O  | -1.99555 | 1.94308  | 0.00007  |
|                         | C  | 7.59083 | 1.56825  | -3.09166 |                          | C  | -0.78674 | 1.27476  | 0.00018  |
|                         | C  | 8.10140 | 1.87165  | -1.74792 |                          | C  | -0.84017 | -0.18030 | 0.00017  |
|                         | C  | 8.34537 | 3.15812  | -1.40655 |                          | C  | -2.08203 | -0.81376 | 0.00014  |
|                         | H  | 7.45175 | 7.03161  | -4.91740 |                          | H  | -6.49522 | 2.14495  | -0.00016 |
|                         | H  | 8.74461 | 5.84685  | -1.00169 |                          | H  | -4.67554 | -1.74399 | 0.00007  |
|                         | H  | 8.72231 | 3.35009  | -0.40617 |                          | H  | -2.09552 | -1.89664 | 0.00015  |
|                         | C  | 8.38145 | 0.82464  | -0.69124 |                          | C  | 0.34041  | -1.02543 | 0.00018  |
|                         | O  | 8.80628 | 1.22063  | 0.39074  |                          | O  | 0.24651  | -2.26857 | -0.00002 |
|                         | O  | 7.32213 | 0.48733  | -3.55466 |                          | O  | 0.19115  | 1.99809  | 0.00014  |
|                         | C  | 8.14763 | -0.59175 | -0.97037 |                          | C  | 1.69001  | -0.42660 | 0.00012  |
|                         | H  | 7.77223 | -0.86030 | -1.94698 |                          | H  | 1.76240  | 0.65217  | 0.00012  |
|                         | C  | 8.40492 | -1.50445 | -0.01220 |                          | C  | 2.79342  | -1.24075 | 0.00008  |
|                         | H  | 8.78070 | -1.12066 | 0.93501  |                          | H  | 2.60921  | -2.31164 | 0.00009  |
|                         | C  | 8.24078 | -2.94281 | -0.09133 |                          | C  | 4.14344  | -0.79389 | 0.00003  |
|                         | C  | 8.56396 | -3.73495 | 1.01827  |                          | C  | 5.20019  | -1.74727 | 0.00002  |
|                         | C  | 7.76842 | -3.60907 | -1.23309 |                          | C  | 4.51970  | 0.58126  | -0.00000 |
|                         | C  | 8.42958 | -5.10969 | 1.00531  |                          | C  | 6.51467  | -1.37683 | -0.00002 |
|                         | C  | 7.62696 | -4.97984 | -1.26684 |                          | C  | 5.82929  | 0.96799  | -0.00005 |
|                         | C  | 7.95459 | -5.77474 | -0.14415 |                          | C  | 6.88058  | 0.00305  | -0.00006 |
|                         | H  | 8.93281 | -3.25212 | 1.91973  |                          | H  | 4.94333  | -2.80214 | 0.00004  |
|                         | H  | 7.50461 | -3.03906 | -2.11863 |                          | H  | 3.75008  | 1.34468  | -0.00000 |
|                         | H  | 8.69488 | -5.67007 | 1.89248  |                          | H  | 7.27864  | -2.14276 | -0.00003 |
|                         | N  | 7.81514 | -7.13862 | -0.17414 |                          | N  | 8.17687  | 0.38210  | -0.00010 |
|                         | C  | 7.32490 | -7.79390 | -1.36900 |                          | C  | 8.53597  | 1.79411  | -0.00009 |
|                         | H  | 7.97992 | -7.61397 | -2.23068 |                          | H  | 8.14693  | 2.29945  | 0.88977  |
|                         | H  | 7.28538 | -8.86919 | -1.19650 |                          | H  | 9.62024  | 1.88552  | -0.00007 |
|                         | H  | 6.31475 | -7.45698 | -1.63358 |                          | H  | 8.14696  | 2.29946  | -0.88995 |
|                         | C  | 8.15837 | -7.92735 | 0.99054  |                          | C  | 9.24082  | -0.61317 | -0.00014 |
|                         | H  | 7.54958 | -7.65375 | 1.86155  |                          | H  | 9.18637  | -1.24847 | -0.89010 |
|                         | H  | 7.98151 | -8.98078 | 0.77477  |                          | H  | 10.20307 | -0.10519 | -0.00024 |
|                         | H  | 9.21460 | -7.81098 | 1.26440  |                          | H  | 9.18651  | -1.24840 | 0.88989  |
|                         | H  | 7.25823 | -5.44294 | -2.17308 |                          | H  | 6.06275  | 2.02431  | -0.00008 |
|                         | Br | 8.44833 | 8.38721  | -2.49641 |                          | Br | -7.42190 | -0.65895 | -0.00009 |

|                  |         |         |          |          |                   |         |          |          |          |
|------------------|---------|---------|----------|----------|-------------------|---------|----------|----------|----------|
| T4(ground state) | C       | 7.39365 | 4.93183  | -4.52756 | T4(excited state) | C       | 5.05767  | -0.34245 | -0.00002 |
|                  | C       | 7.63980 | 6.25068  | -4.18868 |                   | C       | 6.17602  | 0.48211  | -0.00009 |
|                  | C       | 8.12562 | 6.57985  | -2.92043 |                   | C       | 6.00641  | 1.86850  | -0.00010 |
|                  | C       | 8.36430 | 5.58584  | -1.99268 |                   | C       | 4.74145  | 2.42130  | -0.00005 |
|                  | C       | 8.11997 | 4.24524  | -2.32070 |                   | C       | 3.59507  | 1.59978  | 0.00005  |
|                  | C       | 7.63412 | 3.92573  | -3.59158 |                   | C       | 3.78219  | 0.20331  | 0.00006  |
|                  | O       | 7.38866 | 2.64252  | -3.93786 |                   | O       | 2.71214  | -0.63683 | 0.00016  |
|                  | C       | 7.58779 | 1.55991  | -3.09693 |                   | C       | 1.39409  | -0.21448 | 0.00040  |
|                  | C       | 8.09783 | 1.86543  | -1.75515 |                   | C       | 1.16706  | 1.22287  | 0.00014  |
|                  | C       | 8.33994 | 3.15332  | -1.41938 |                   | C       | 2.26552  | 2.07902  | 0.00004  |
|                  | H       | 7.45066 | 7.02757  | -4.92106 |                   | H       | 7.16561  | 0.04119  | -0.00014 |
|                  | H       | 8.74164 | 5.82472  | -1.00322 |                   | H       | 4.60745  | 3.49860  | -0.00008 |
|                  | H       | 8.71688 | 3.34885  | -0.41965 |                   | H       | 2.07273  | 3.14478  | -0.00011 |
|                  | C       | 8.37882 | 0.82159  | -0.69644 |                   | C       | -0.15404 | 1.82645  | -0.00008 |
|                  | O       | 8.80421 | 1.21976  | 0.38468  |                   | O       | -0.29910 | 3.06508  | -0.00004 |
|                  | O       | 7.31933 | 0.48063  | -3.56145 |                   | O       | 0.57719  | -1.11397 | -0.00014 |
|                  | C       | 8.14580 | -0.59530 | -0.97358 |                   | C       | -1.36125 | 0.97857  | -0.00009 |
|                  | H       | 7.77024 | -0.86528 | -1.94980 |                   | H       | -1.22267 | -0.09367 | -0.00012 |
|                  | C       | 8.40366 | -1.50704 | -0.01475 |                   | C       | -2.60355 | 1.56040  | -0.00006 |
|                  | H       | 8.77951 | -1.12224 | 0.93207  |                   | H       | -2.63436 | 2.64658  | -0.00001 |
|                  | C       | 8.24011 | -2.94556 | -0.09237 |                   | C       | -3.83842 | 0.85528  | -0.00005 |
|                  | C       | 8.56391 | -3.73622 | 1.01807  |                   | C       | -5.06354 | 1.57998  | 0.00007  |
|                  | C       | 7.76779 | -3.61331 | -1.23331 |                   | C       | -3.93473 | -0.56748 | -0.00016 |
|                  | C       | 8.43015 | -5.11104 | 1.00674  |                   | C       | -6.27836 | 0.95599  | 0.00009  |
|                  | C       | 7.62696 | -4.98420 | -1.26539 |                   | C       | -5.14163 | -1.20629 | -0.00014 |
|                  | C       | 7.95520 | -5.77762 | -0.14185 |                   | C       | -6.36333 | -0.46907 | -0.00001 |
|                  | H       | 8.93274 | -3.25219 | 1.91890  |                   | H       | -5.02125 | 2.66485  | 0.00016  |
|                  | H       | 7.50351 | -3.04449 | -2.11948 |                   | H       | -3.02918 | -1.16334 | -0.00027 |
|                  | H       | 8.69590 | -5.67030 | 1.89449  |                   | H       | -7.17918 | 1.55506  | 0.00019  |
|                  | N       | 7.81637 | -7.14163 | -0.17012 |                   | N       | -7.55897 | -1.09767 | 0.00001  |
|                  | C       | 7.32618 | -7.79878 | -1.36396 |                   | C       | -7.63088 | -2.55264 | -0.00005 |
|                  | H       | 7.98089 | -7.61969 | -2.22605 |                   | H       | -7.14921 | -2.97101 | 0.88969  |
|                  | H       | 7.28725 | -8.87386 | -1.18997 |                   | H       | -8.67545 | -2.85738 | 0.00004  |
|                  | H       | 6.31579 | -7.46274 | -1.62875 |                   | H       | -7.14937 | -2.97094 | -0.88990 |
|                  | C       | 8.16023 | -7.92870 | 0.99541  |                   | C       | -8.79902 | -0.33332 | 0.00010  |
|                  | H       | 7.55152 | -7.65430 | 1.86625  |                   | H       | -8.87186 | 0.30033  | -0.88978 |
|                  | H       | 7.98380 | -8.98249 | 0.78101  |                   | H       | -9.64146 | -1.02201 | 0.00003  |
|                  | H       | 9.21648 | -7.81152 | 1.26891  |                   | H       | -8.87185 | 0.30013  | 0.89013  |
|                  | H       | 7.25823 | -5.44848 | -2.17104 |                   | H       | -5.16082 | -2.28796 | -0.00023 |
|                  | Br      | 6.73807 | 4.49226  | -6.24020 |                   | Br      | 5.27916  | -2.22326 | 0.00001  |
| H                | 8.31250 | 7.61910 | -2.67321 | H        | 6.88090           | 2.51125 | -0.00017 |          |          |

|                         |         |         |          |          |                          |          |           |          |          |
|-------------------------|---------|---------|----------|----------|--------------------------|----------|-----------|----------|----------|
| <b>T5(ground state)</b> | C       | 7.39373 | 4.93432  | -4.52722 | <b>T5(excited state)</b> | C        | 3.85782   | 1.21544  | -0.00001 |
|                         | C       | 7.63884 | 6.25307  | -4.19080 |                          | C        | 5.06645   | 0.52696  | -0.00008 |
|                         | C       | 8.12406 | 6.56728  | -2.92052 |                          | C        | 5.03540   | -0.86555 | -0.00008 |
|                         | C       | 8.36574 | 5.58208  | -1.98733 |                          | C        | 3.85213   | -1.57058 | -0.00003 |
|                         | C       | 8.11931 | 4.24479  | -2.32251 |                          | C        | 2.62249   | -0.87862 | 0.00004  |
|                         | C       | 7.63381 | 3.92596  | -3.59239 |                          | C        | 2.65225   | 0.53174  | 0.00005  |
|                         | O       | 7.38818 | 2.64510  | -3.94019 |                          | O        | 1.49617   | 1.24674  | 0.00012  |
|                         | C       | 7.58758 | 1.56093  | -3.09881 |                          | C        | 0.23179   | 0.67689  | 0.00025  |
|                         | C       | 8.09793 | 1.86677  | -1.75628 |                          | C        | 0.17011   | -0.77360 | 0.00014  |
|                         | C       | 8.34034 | 3.15290  | -1.41883 |                          | C        | 1.35895   | -1.50562 | 0.00007  |
|                         | H       | 7.45345 | 7.03762  | -4.91424 |                          | H        | 6.00453   | 1.06551  | -0.00012 |
|                         | H       | 8.74272 | 5.82979  | -1.00135 |                          | H        | 3.85320   | -2.65434 | -0.00005 |
|                         | H       | 8.71730 | 3.34876  | -0.41929 |                          | H        | 1.28818   | -2.58599 | 0.00001  |
|                         | C       | 8.37930 | 0.82095  | -0.69654 |                          | C        | -1.07439  | -1.51961 | 0.00010  |
|                         | O       | 8.80425 | 1.22199  | 0.38328  |                          | O        | -1.08509  | -2.76378 | -0.00002 |
|                         | O       | 7.31929 | 0.48283  | -3.56319 |                          | O        | -0.68011  | 1.48012  | 0.00006  |
|                         | C       | 8.14615 | -0.59433 | -0.97405 |                          | C        | -2.37400  | -0.81029 | 0.00009  |
|                         | H       | 7.77063 | -0.86509 | -1.95000 |                          | H        | -2.35636  | 0.27072  | 0.00011  |
|                         | C       | 8.40407 | -1.50637 | -0.01460 |                          | C        | -3.53866  | -1.52884 | 0.00005  |
|                         | H       | 8.77991 | -1.12137 | 0.93211  |                          | H        | -3.44562  | -2.61159 | 0.00004  |
|                         | C       | 8.24048 | -2.94408 | -0.09225 |                          | C        | -4.84740  | -0.96974 | 0.00004  |
|                         | C       | 8.56414 | -3.73474 | 1.01852  |                          | C        | -5.97914  | -1.83173 | 0.00004  |
|                         | C       | 7.76818 | -3.61184 | -1.23348 |                          | C        | -5.10587  | 0.43170  | 0.00003  |
|                         | C       | 8.43028 | -5.10927 | 1.00716  |                          | C        | -7.25791  | -1.35282 | 0.00004  |
|                         | C       | 7.62725 | -4.98248 | -1.26558 |                          | C        | -6.37772  | 0.92724  | 0.00002  |
|                         | C       | 7.95536 | -5.77591 | -0.14170 |                          | C        | -7.50651  | 0.05319  | 0.00003  |
|                         | H       | 8.93288 | -3.25067 | 1.91934  |                          | H        | -5.81133  | -2.90432 | 0.00005  |
|                         | H       | 7.50408 | -3.04308 | -2.11972 |                          | H        | -4.27497  | 1.12790  | 0.00002  |
|                         | H       | 8.69581 | -5.66863 | 1.89488  |                          | H        | -8.08340  | -2.05189 | 0.00004  |
|                         | N       | 7.81647 | -7.13939 | -0.16998 |                          | N        | -8.76485  | 0.53944  | 0.00002  |
|                         | C       | 7.32631 | -7.79664 | -1.36397 |                          | C        | -9.00466  | 1.97730  | -0.00001 |
|                         | H       | 7.98126 | -7.61768 | -2.22584 |                          | H        | -8.57479  | 2.44751  | -0.89006 |
|                         | H       | 7.28727 | -8.87165 | -1.18986 |                          | H        | -10.07742 | 2.15875  | -0.00003 |
|                         | H       | 6.31601 | -7.46050 | -1.62873 |                          | H        | -8.57481  | 2.44755  | 0.89002  |
|                         | C       | 8.16011 | -7.92683 | 0.99564  |                          | C        | -9.90961  | -0.36280 | 0.00004  |
|                         | H       | 7.55118 | -7.65241 | 1.86624  |                          | H        | -9.90839  | -0.99978 | 0.89021  |
|                         | H       | 7.98359 | -8.98050 | 0.78094  |                          | H        | -10.82530 | 0.22477  | 0.00008  |
|                         | H       | 9.21631 | -7.80970 | 1.26909  |                          | H        | -9.90844  | -0.99976 | -0.89015 |
|                         | H       | 7.25865 | -5.44683 | -2.17120 |                          | H        | -6.52163  | 1.99934  | 0.00001  |
|                         | Br      | 6.73915 | 4.50081  | -6.23835 |                          | Br       | 3.87135   | 3.10624  | -0.00000 |
| Br                      | 8.45087 | 8.38052 | -2.48646 | Br       | 6.68562                  | -1.81021 | -0.00018  |          |          |

|                           |    |          |          |          |                            |    |          |          |          |
|---------------------------|----|----------|----------|----------|----------------------------|----|----------|----------|----------|
| <b>T6a</b> (ground state) | H  | 6.33402  | 4.64147  | -5.19814 | <b>T6a</b> (excited state) | H  | -6.78103 | -2.67721 | -0.00087 |
|                           | C  | 6.94871  | 4.91779  | -4.34884 |                            | C  | -6.73604 | -1.59350 | -0.00059 |
|                           | C  | 7.32423  | 6.22851  | -4.10845 |                            | C  | -7.88358 | -0.81162 | -0.00058 |
|                           | C  | 8.11912  | 6.56018  | -3.00393 |                            | C  | -7.78663 | 0.58511  | -0.00022 |
|                           | C  | 8.53849  | 5.57095  | -2.13731 |                            | C  | -6.54855 | 1.19623  | 0.00013  |
|                           | C  | 8.17116  | 4.23432  | -2.35923 |                            | C  | -5.36641 | 0.42822  | 0.00014  |
|                           | C  | 7.37800  | 3.93082  | -3.46804 |                            | C  | -5.49813 | -0.96931 | -0.00024 |
|                           | O  | 7.00004  | 2.65020  | -3.71951 |                            | O  | -4.38893 | -1.76567 | -0.00025 |
|                           | C  | 7.35186  | 1.57256  | -2.93251 |                            | C  | -3.09602 | -1.28917 | 0.00006  |
|                           | C  | 8.18535  | 1.86553  | -1.76027 |                            | C  | -2.92740 | 0.16435  | 0.00046  |
|                           | C  | 8.55806  | 3.14511  | -1.51649 |                            | C  | -4.05428 | 0.96529  | 0.00048  |
|                           | H  | 6.99594  | 7.00856  | -4.78820 |                            | H  | -8.85814 | -1.28911 | -0.00086 |
|                           | H  | 8.40336  | 7.59276  | -2.83181 |                            | H  | -8.68848 | 1.18912  | -0.00022 |
|                           | H  | 9.15518  | 5.80977  | -1.27585 |                            | H  | -6.46480 | 2.27909  | 0.00041  |
|                           | H  | 9.17480  | 3.33003  | -0.64156 |                            | H  | -3.90235 | 2.03861  | 0.00077  |
|                           | C  | 8.66880  | 0.82010  | -0.78362 |                            | C  | -1.62813 | 0.83417  | 0.00080  |
|                           | O  | 9.36073  | 1.19902  | 0.15612  |                            | O  | -1.55886 | 2.08295  | 0.00032  |
|                           | O  | 6.93344  | 0.49844  | -3.29320 |                            | O  | -2.23558 | -2.14625 | -0.00019 |
|                           | C  | 8.31328  | -0.59152 | -0.96949 |                            | C  | -0.39618 | 0.04911  | 0.00063  |
|                           | H  | 7.70044  | -0.84441 | -1.82213 |                            | H  | -0.48743 | -1.02764 | 0.00074  |
|                           | C  | 8.75869  | -1.50081 | -0.08300 |                            | C  | 0.82541  | 0.69640  | 0.00041  |
|                           | H  | 9.36740  | -1.12411 | 0.73325  |                            | H  | 0.79440  | 1.77950  | 0.00032  |
|                           | C  | 8.51033  | -2.93277 | -0.10401 |                            | C  | 2.08237  | 0.04497  | 0.00028  |
|                           | C  | 9.01861  | -3.80779 | 0.86795  |                            | C  | 3.32747  | 0.75554  | -0.00004 |
|                           | C  | 7.73730  | -3.54058 | -1.10905 |                            | C  | 2.20326  | -1.38132 | 0.00047  |
|                           | C  | 8.78675  | -5.16974 | 0.85446  |                            | C  | 4.54138  | 0.12498  | -0.00017 |
|                           | C  | 7.48656  | -4.89308 | -1.15302 |                            | C  | 3.40384  | -2.02743 | 0.00033  |
|                           | C  | 8.00883  | -5.75470 | -0.16344 |                            | C  | 4.62613  | -1.29460 | 0.00001  |
|                           | H  | 9.21487  | -5.77437 | 1.64085  |                            | H  | 5.43826  | 0.72771  | -0.00040 |
|                           | N  | 7.77191  | -7.10244 | -0.18797 |                            | N  | 5.82540  | -1.92165 | -0.00012 |
|                           | C  | 6.96772  | -7.67796 | -1.24718 |                            | C  | 5.89647  | -3.37544 | 0.00011  |
|                           | H  | 7.41297  | -7.50633 | -2.23495 |                            | H  | 5.41495  | -3.79555 | -0.88948 |
|                           | H  | 6.89395  | -8.75429 | -1.09450 |                            | H  | 6.94118  | -3.68040 | -0.00004 |
|                           | H  | 5.95063  | -7.26705 | -1.25472 |                            | H  | 5.41529  | -3.79526 | 0.89001  |
|                           | C  | 8.32431  | -7.95539 | 0.84452  |                            | C  | 7.06173  | -1.15417 | -0.00043 |
|                           | H  | 7.95819  | -7.67683 | 1.84055  |                            | H  | 7.13367  | -0.51923 | 0.88934  |
|                           | H  | 8.02776  | -8.98628 | 0.65356  |                            | H  | 7.90678  | -1.83992 | -0.00053 |
|                           | H  | 9.42064  | -7.91601 | 0.86049  |                            | H  | 7.13332  | -0.51940 | -0.89035 |
|                           | H  | 6.88166  | -5.28608 | -1.95961 |                            | H  | 3.41631  | -3.10919 | 0.00049  |
|                           | H  | 7.31599  | -2.91642 | -1.89001 |                            | H  | 1.29750  | -1.97553 | 0.00072  |
|                           | Br | 10.08878 | -3.15626 | 2.30567  |                            | Br | 3.33426  | 2.64602  | -0.00030 |



|                  |         |          |          |          |                   |         |          |          |          |
|------------------|---------|----------|----------|----------|-------------------|---------|----------|----------|----------|
| T7(ground state) | H       | 6.77807  | 4.71550  | -5.37525 | T7(excited state) | H       | 6.56499  | -2.77503 | 0.40800  |
|                  | C       | 7.25846  | 4.97462  | -4.43850 |                   | C       | 6.68582  | -1.70786 | 0.25814  |
|                  | C       | 7.57998  | 6.28152  | -4.11377 |                   | C       | 7.93593  | -1.11494 | 0.16833  |
|                  | C       | 8.20067  | 6.59119  | -2.89688 |                   | C       | 8.05549  | 0.26557  | -0.02513 |
|                  | C       | 8.49945  | 5.58366  | -2.00210 |                   | C       | 6.92415  | 1.05140  | -0.12850 |
|                  | C       | 8.18355  | 4.25027  | -2.30782 |                   | C       | 5.64486  | 0.47552  | -0.04101 |
|                  | C       | 7.56513  | 3.96893  | -3.52841 |                   | C       | 5.55823  | -0.90652 | 0.15261  |
|                  | O       | 7.24293  | 2.69234  | -3.86407 |                   | O       | 4.33944  | -1.52001 | 0.24530  |
|                  | C       | 7.48723  | 1.59817  | -3.06074 |                   | C       | 3.14028  | -0.86984 | 0.15944  |
|                  | C       | 8.13313  | 1.86812  | -1.77052 |                   | C       | 3.19967  | 0.58982  | -0.03795 |
|                  | C       | 8.45364  | 3.14369  | -1.44332 |                   | C       | 4.42658  | 1.21142  | -0.13689 |
|                  | H       | 7.34606  | 7.07611  | -4.81532 |                   | H       | 8.82630  | -1.72998 | 0.24929  |
|                  | H       | 8.44493  | 7.62119  | -2.66029 |                   | H       | 9.03866  | 0.71928  | -0.09410 |
|                  | H       | 8.98030  | 5.80527  | -1.05389 |                   | H       | 7.00654  | 2.12386  | -0.27886 |
|                  | H       | 8.93293  | 3.31192  | -0.48311 |                   | H       | 4.48136  | 2.28391  | -0.28780 |
|                  | C       | 8.47336  | 0.80170  | -0.76093 |                   | C       | 1.99614  | 1.36294  | -0.13518 |
|                  | O       | 9.03432  | 1.15057  | 0.27204  |                   | O       | 2.16687  | 2.64155  | -0.34307 |
|                  | O       | 7.14403  | 0.52894  | -3.50477 |                   | O       | 2.14644  | -1.54962 | 0.25263  |
|                  | C       | 8.13247  | -0.60735 | -1.01691 |                   | C       | 0.64879  | 0.89758  | -0.05950 |
|                  | H       | 7.64264  | -0.84557 | -1.95026 |                   | H       | 0.53778  | -0.17538 | 0.00728  |
|                  | C       | 8.43896  | -1.53360 | -0.09474 |                   | C       | -0.40906 | 1.75330  | -0.07553 |
|                  | H       | 8.93683  | -1.18481 | 0.80804  |                   | H       | -0.21892 | 2.82348  | -0.09825 |
|                  | C       | 8.18122  | -2.96781 | -0.16480 |                   | C       | -1.80935 | 1.37281  | -0.03455 |
|                  | C       | 8.59426  | -3.79102 | 0.88447  |                   | C       | -2.79102 | 2.35927  | 0.11145  |
|                  | C       | 7.51682  | -3.57081 | -1.24070 |                   | C       | -2.24364 | 0.04337  | -0.15066 |
|                  | C       | 8.38061  | -5.15951 | 0.85205  |                   | C       | -4.13500 | 2.03425  | 0.17653  |
|                  | C       | 7.28814  | -4.93166 | -1.25850 |                   | C       | -3.58636 | -0.27113 | -0.10298 |
|                  | C       | 7.73172  | -5.77867 | -0.22303 |                   | C       | -4.58048 | 0.70926  | 0.08562  |
|                  | H       | 9.10711  | -3.35146 | 1.73534  |                   | H       | -2.49063 | 3.40007  | 0.19395  |
|                  | H       | 7.14766  | -2.97039 | -2.06399 |                   | H       | -1.52992 | -0.75593 | -0.31279 |
|                  | N       | 7.49115  | -7.16207 | -0.25365 |                   | N       | -5.94380 | 0.37306  | 0.13006  |
|                  | C       | 8.22259  | -7.92056 | -1.26381 |                   | C       | -6.38389 | -0.37235 | 1.30515  |
|                  | H       | 8.19788  | -7.40910 | -2.22433 |                   | H       | -5.68613 | -1.17534 | 1.53623  |
|                  | H       | 9.27343  | -8.07679 | -0.97186 |                   | H       | -6.47915 | 0.28000  | 2.18803  |
|                  | H       | 7.74932  | -8.89867 | -1.38909 |                   | H       | -7.36008 | -0.82108 | 1.09974  |
|                  | C       | 7.47399  | -7.84972 | 1.02328  |                   | C       | -6.88529 | 1.41660  | -0.22680 |
|                  | H       | 6.86506  | -7.29540 | 1.74055  |                   | H       | -6.56613 | 1.91229  | -1.14607 |
|                  | H       | 7.02162  | -8.83492 | 0.87875  |                   | H       | -7.86068 | 0.95563  | -0.40681 |
|                  | H       | 8.47743  | -8.00317 | 1.45426  |                   | H       | -7.01680 | 2.17905  | 0.55922  |
|                  | Br      | 6.27072  | -5.62624 | -2.70585 |                   | Br      | -4.06724 | -2.08748 | -0.39020 |
| H                | 8.73761 | -5.76688 | 1.67530  | H        | -4.86042          | 2.82731 | 0.31514  |          |          |

|                  |         |          |          |          |                   |          |          |          |          |
|------------------|---------|----------|----------|----------|-------------------|----------|----------|----------|----------|
| T8(ground state) | H       | -6.14034 | -2.63201 | -0.04377 | T8(excited state) | H        | -6.95518 | -1.74147 | 1.90038  |
|                  | C       | -6.12907 | -1.54793 | -0.03257 |                   | C        | -6.91166 | -0.94168 | 1.16925  |
|                  | C       | -7.29445 | -0.80049 | -0.03394 |                   | C        | -8.05603 | -0.32078 | 0.69078  |
|                  | C       | -7.25400 | 0.59951  | -0.01888 |                   | C        | -7.96183 | 0.70854  | -0.25197 |
|                  | C       | -6.03741 | 1.25133  | -0.00288 |                   | C        | -6.72507 | 1.11482  | -0.71441 |
|                  | C       | -4.84144 | 0.51611  | -0.00133 |                   | C        | -5.54871 | 0.50216  | -0.24654 |
|                  | C       | -4.90980 | -0.87917 | -0.01579 |                   | C        | -5.67622 | -0.52410 | 0.69696  |
|                  | O       | -3.77703 | -1.62902 | -0.01348 |                   | O        | -4.56813 | -1.15685 | 1.19028  |
|                  | C       | -2.50181 | -1.10059 | 0.00444  |                   | C        | -3.28417 | -0.85806 | 0.82082  |
|                  | C       | -2.40398 | 0.36390  | 0.01202  |                   | C        | -3.11874 | 0.22319  | -0.16330 |
|                  | C       | -3.53821 | 1.10524  | 0.01314  |                   | C        | -4.23555 | 0.85705  | -0.67087 |
|                  | H       | -8.25259 | -1.31050 | -0.04678 |                   | H        | -9.02854 | -0.63817 | 1.05284  |
|                  | H       | -8.17771 | 1.16813  | -0.01992 |                   | H        | -8.86236 | 1.18869  | -0.62081 |
|                  | H       | -5.98683 | 2.33612  | 0.00874  |                   | H        | -6.64273 | 1.91280  | -1.44656 |
|                  | H       | -3.43358 | 2.18642  | 0.02573  |                   | H        | -4.11617 | 1.64628  | -1.40452 |
|                  | C       | -1.09864 | 1.11679  | 0.02691  |                   | C        | -1.81477 | 0.61379  | -0.60481 |
|                  | O       | -1.14552 | 2.33939  | 0.09436  |                   | O        | -1.73598 | 1.53534  | -1.51148 |
|                  | O       | -1.59755 | -1.89965 | 0.01500  |                   | O        | -2.40743 | -1.51012 | 1.33715  |
|                  | C       | 0.18540  | 0.39346  | -0.04608 |                   | C        | -0.55597 | 0.04577  | -0.20499 |
|                  | H       | 0.15858  | -0.67666 | -0.17541 |                   | H        | -0.58559 | -0.89747 | 0.31804  |
|                  | C       | 1.31969  | 1.09754  | 0.08287  |                   | C        | 0.59398  | 0.70407  | -0.52547 |
|                  | H       | 1.20318  | 2.16037  | 0.27432  |                   | H        | 0.48828  | 1.69946  | -0.94678 |
|                  | C       | 2.70027  | 0.61383  | 0.05487  |                   | C        | 1.94826  | 0.27176  | -0.26375 |
|                  | C       | 3.67720  | 1.23292  | 0.85703  |                   | C        | 2.94995  | 1.22022  | 0.05570  |
|                  | C       | 3.20147  | -0.42724 | -0.74694 |                   | C        | 2.42560  | -1.05870 | -0.32093 |
|                  | C       | 5.00356  | 0.85852  | 0.89813  |                   | C        | 4.26030  | 0.90418  | 0.32727  |
|                  | C       | 4.52393  | -0.82670 | -0.74161 |                   | C        | 3.72989  | -1.41219 | -0.05110 |
|                  | C       | 5.46588  | -0.19863 | 0.09316  |                   | C        | 4.68946  | -0.43870 | 0.29331  |
|                  | H       | 5.67216  | 1.38941  | 1.55991  |                   | H        | 4.94624  | 1.70119  | 0.57456  |
|                  | N       | 6.77519  | -0.59431 | 0.11653  |                   | N        | 5.98017  | -0.77972 | 0.57188  |
|                  | C       | 7.22273  | -1.66822 | -0.74749 |                   | C        | 6.39194  | -2.17008 | 0.52473  |
|                  | H       | 7.09222  | -1.42188 | -1.80901 |                   | H        | 6.28094  | -2.59304 | -0.48125 |
|                  | H       | 8.28246  | -1.84956 | -0.57112 |                   | H        | 7.44143  | -2.24060 | 0.80740  |
|                  | H       | 6.68287  | -2.60052 | -0.54339 |                   | H        | 5.81089  | -2.78380 | 1.22277  |
|                  | C       | 7.72715  | 0.10506  | 0.95588  |                   | C        | 6.95163  | 0.24972  | 0.89000  |
|                  | H       | 7.44986  | 0.04717  | 2.01536  |                   | H        | 6.66541  | 0.80980  | 1.78811  |
|                  | H       | 8.70849  | -0.35409 | 0.84123  |                   | H        | 7.91740  | -0.21750 | 1.07781  |
|                  | H       | 7.81366  | 1.16413  | 0.68165  |                   | H        | 7.07291  | 0.96086  | 0.06399  |
|                  | H       | 4.81926  | -1.62782 | -1.40313 |                   | H        | 4.00498  | -2.45390 | -0.12764 |
|                  | Br      | 3.18467  | 2.66619  | 2.01223  |                   | Br       | 2.49857  | 3.06486  | 0.16321  |
| Br               | 2.09469 | -1.34797 | -1.99068 | Br       | 1.30369           | -2.49308 | -0.86645 |          |          |

**Table S4.** The Cartesian Coordinates (in Å) of species studied, optimized with WB97XD+IDSCRF/6-31G(d)

| Compounds                | Cartesian coordinates |          |          |          | Species                   | Cartesian coordinates |          |          |          |
|--------------------------|-----------------------|----------|----------|----------|---------------------------|-----------------------|----------|----------|----------|
| <b>T1</b> (ground state) | H                     | 7.01107  | 4.62632  | -5.51155 | <b>T1</b> (excited state) | H                     | 5.90393  | 2.74133  | 0.00101  |
|                          | C                     | 7.38757  | 4.91315  | -4.53567 |                           | C                     | 5.95554  | 1.65751  | 0.00074  |
|                          | C                     | 7.63033  | 6.23634  | -4.20237 |                           | C                     | 7.16922  | 0.98189  | 0.00085  |
|                          | C                     | 8.11724  | 6.58484  | -2.93449 |                           | C                     | 7.20175  | -0.41942 | 0.00049  |
|                          | C                     | 8.36152  | 5.59935  | -1.99674 |                           | C                     | 6.02285  | -1.14156 | 0.00002  |
|                          | C                     | 8.12340  | 4.25047  | -2.31042 |                           | C                     | 4.77654  | -0.48262 | -0.00013 |
|                          | C                     | 7.63788  | 3.92949  | -3.58156 |                           | C                     | 4.77712  | 0.92093  | 0.00023  |
|                          | O                     | 7.39424  | 2.64013  | -3.92612 |                           | O                     | 3.60301  | 1.61190  | 0.00009  |
|                          | C                     | 7.59586  | 1.56573  | -3.08419 |                           | C                     | 2.35965  | 1.01908  | -0.00062 |
|                          | C                     | 8.10625  | 1.87308  | -1.73969 |                           | C                     | 2.32278  | -0.44889 | -0.00057 |
|                          | C                     | 8.34716  | 3.16491  | -1.40375 |                           | C                     | 3.51610  | -1.14137 | -0.00048 |
|                          | H                     | 7.43927  | 7.01253  | -4.93721 |                           | H                     | 8.09639  | 1.54677  | 0.00124  |
|                          | H                     | 8.30114  | 7.62634  | -2.69215 |                           | H                     | 8.15549  | -0.93813 | 0.00061  |
|                          | H                     | 8.73885  | 5.85099  | -1.00941 |                           | H                     | 6.03778  | -2.22810 | -0.00022 |
|                          | H                     | 8.72423  | 3.36538  | -0.40395 |                           | H                     | 3.46632  | -2.22547 | -0.00056 |
|                          | C                     | 8.38959  | 0.83081  | -0.67760 |                           | C                     | 1.08589  | -1.24206 | -0.00055 |
|                          | O                     | 8.81576  | 1.22765  | 0.40366  |                           | O                     | 1.14452  | -2.49300 | -0.00085 |
|                          | O                     | 7.32957  | 0.48148  | -3.54575 |                           | O                     | 1.42544  | 1.79362  | 0.00014  |
|                          | C                     | 8.15560  | -0.58961 | -0.95417 |                           | C                     | -0.20844 | -0.57616 | -0.00048 |
|                          | H                     | 7.77897  | -0.85954 | -1.93126 |                           | H                     | -0.22637 | 0.50576  | -0.00083 |
|                          | C                     | 8.41313  | -1.50365 | 0.00394  |                           | C                     | -1.37609 | -1.32952 | -0.00013 |
|                          | H                     | 8.79033  | -1.12411 | 0.95359  |                           | H                     | -1.25900 | -2.41066 | 0.00028  |
|                          | C                     | 8.24568  | -2.94430 | -0.08154 |                           | C                     | -2.68690 | -0.79832 | -0.00011 |
|                          | C                     | 8.56738  | -3.74169 | 1.02611  |                           | C                     | -3.81257 | -1.67975 | 0.00077  |
|                          | C                     | 7.77191  | -3.60508 | -1.22713 |                           | C                     | -2.97638 | 0.60445  | -0.00094 |
|                          | C                     | 8.42995  | -5.11797 | 1.00772  |                           | C                     | -5.09933 | -1.22073 | 0.00092  |
|                          | C                     | 7.62738  | -4.97747 | -1.26640 |                           | C                     | -4.26090 | 1.07505  | -0.00076 |
|                          | C                     | 7.95321  | -5.77831 | -0.14571 |                           | C                     | -5.37420 | 0.18251  | 0.00023  |
|                          | H                     | 8.93747  | -3.26485 | 1.93105  |                           | H                     | -3.62931 | -2.75073 | 0.00133  |
|                          | H                     | 7.50877  | -3.03308 | -2.11245 |                           | H                     | -2.16069 | 1.31972  | -0.00177 |
|                          | H                     | 8.69488  | -5.68055 | 1.89490  |                           | H                     | -5.91142 | -1.93726 | 0.00157  |
|                          | N                     | 7.81069  | -7.14239 | -0.18093 |                           | N                     | -6.64742 | 0.64714  | 0.00048  |
| C                        | 7.32012               | -7.79082 | -1.37928 | C        | -6.90853                  | 2.07810               | -0.00049 |          |          |
| H                        | 7.97880               | -7.60859 | -2.23877 | H        | -6.48670                  | 2.55617               | -0.89236 |          |          |
| H                        | 7.27640               | -8.86774 | -1.21312 | H        | -7.98463                  | 2.24633               | 0.00040  |          |          |
| H                        | 6.31021               | -7.44891 | -1.64179 | H        | -6.48507                  | 2.55760               | 0.88982  |          |          |
| C                        | 8.15348               | -7.93542 | 0.98082  | C        | -7.77166                  | -0.27617              | 0.00092  |          |          |
| H                        | 7.54393               | -7.66272 | 1.85265  | H        | -7.75947                  | -0.91432              | 0.89221  |          |          |
| H                        | 7.97486               | -8.98898 | 0.76320  | H        | -8.70116                  | 0.29158               | 0.00124  |          |          |
| H                        | 9.21142               | -7.82141 | 1.25254  | H        | -7.76011                  | -0.91447              | -0.89030 |          |          |
| H                        | 7.25753               | -5.43370 | -2.17684 | H        | -4.42255                  | 2.14605               | -0.00147 |          |          |

|                  |    |          |          |          |                    |    |          |          |          |
|------------------|----|----------|----------|----------|--------------------|----|----------|----------|----------|
| T2(ground state) | H  | -4.57786 | 3.77944  | -0.09013 | T2 (excited state) | H  | 4.41560  | 3.80795  | 0.04612  |
|                  | C  | -4.73133 | 2.70640  | -0.06934 |                    | C  | 4.61224  | 2.74139  | 0.03690  |
|                  | C  | -5.99436 | 2.14279  | -0.09918 |                    | C  | 5.90459  | 2.23337  | 0.04338  |
|                  | C  | -6.16844 | 0.75390  | -0.07123 |                    | C  | 6.12288  | 0.85269  | 0.03118  |
|                  | C  | -5.05987 | -0.06730 | -0.01286 |                    | C  | 5.04303  | -0.00964 | 0.01251  |
|                  | C  | -3.75566 | 0.46452  | 0.01943  |                    | C  | 3.70978  | 0.45841  | 0.00508  |
|                  | C  | -3.62745 | 1.85887  | -0.01022 |                    | C  | 3.54333  | 1.85679  | 0.01798  |
|                  | O  | -2.40515 | 2.44059  | 0.01857  |                    | O  | 2.29453  | 2.39881  | 0.01227  |
|                  | C  | -1.21320 | 1.74599  | 0.07704  |                    | C  | 1.12786  | 1.66539  | -0.00780 |
|                  | C  | -1.31874 | 0.28105  | 0.10402  |                    | C  | 1.26905  | 0.20819  | -0.01805 |
|                  | C  | -2.54339 | -0.29792 | 0.07923  |                    | C  | 2.53841  | -0.34301 | -0.01367 |
|                  | H  | -6.86831 | 2.78478  | -0.14497 |                    | H  | 6.75302  | 2.90964  | 0.05802  |
|                  | H  | -7.16330 | 0.32434  | -0.09516 |                    | H  | 7.13176  | 0.45551  | 0.03627  |
|                  | H  | -2.58647 | -1.38272 | 0.10700  |                    | H  | 2.61401  | -1.42375 | -0.02424 |
|                  | C  | -0.12861 | -0.65772 | 0.16262  |                    | C  | 0.13884  | -0.72213 | -0.03541 |
|                  | O  | -0.36364 | -1.85875 | 0.25470  |                    | O  | 0.33395  | -1.95656 | -0.05828 |
|                  | O  | -0.21339 | 2.42133  | 0.10349  |                    | O  | 0.11087  | 2.32767  | -0.01241 |
|                  | C  | 1.23395  | -0.12491 | 0.09383  |                    | C  | -1.22974 | -0.21079 | -0.03501 |
|                  | H  | 1.35679  | 0.94687  | 0.01878  |                    | H  | -1.37541 | 0.86117  | -0.05759 |
|                  | C  | 2.28097  | -0.97574 | 0.12454  |                    | C  | -2.29623 | -1.09642 | -0.01386 |
|                  | H  | 2.04628  | -2.03720 | 0.20419  |                    | H  | -2.05023 | -2.15552 | 0.01097  |
|                  | C  | 3.69276  | -0.64142 | 0.06137  |                    | C  | -3.66161 | -0.72553 | -0.01210 |
|                  | C  | 4.64591  | -1.66948 | 0.09692  |                    | C  | -4.67113 | -1.73490 | 0.04330  |
|                  | C  | 4.17638  | 0.67397  | -0.03711 |                    | C  | -4.11581 | 0.63059  | -0.06113 |
|                  | C  | 6.00433  | -1.41658 | 0.03704  |                    | C  | -6.00361 | -1.43388 | 0.05220  |
|                  | C  | 5.52787  | 0.94811  | -0.09779 |                    | C  | -5.44636 | 0.94478  | -0.05174 |
|                  | C  | 6.48642  | -0.09301 | -0.06295 |                    | C  | -6.44452 | -0.07450 | 0.00533  |
|                  | H  | 4.30847  | -2.70076 | 0.17314  |                    | H  | -4.35989 | -2.77522 | 0.08055  |
|                  | H  | 3.47940  | 1.50675  | -0.06680 |                    | H  | -3.39158 | 1.43708  | -0.10722 |
|                  | H  | 6.69210  | -2.25303 | 0.06776  |                    | H  | -6.72352 | -2.24162 | 0.09610  |
|                  | N  | 7.83010  | 0.17559  | -0.12396 |                    | N  | -7.76191 | 0.23451  | 0.01397  |
|                  | C  | 8.29317  | 1.54278  | -0.24191 |                    | C  | -8.19391 | 1.62384  | -0.02951 |
|                  | H  | 7.97964  | 2.15224  | 0.61575  |                    | H  | -7.84290 | 2.11716  | -0.94298 |
|                  | H  | 9.38306  | 1.55129  | -0.27731 |                    | H  | -9.28228 | 1.66089  | -0.01855 |
|                  | H  | 7.92158  | 2.02120  | -1.15793 |                    | H  | -7.82183 | 2.18020  | 0.83848  |
|                  | C  | 8.78656  | -0.91136 | -0.10490 |                    | C  | -8.76797 | -0.81562 | 0.07772  |
|                  | H  | 8.64544  | -1.59232 | -0.95496 |                    | H  | -8.66602 | -1.40531 | 0.99596  |
|                  | H  | 9.79620  | -0.50369 | -0.16512 |                    | H  | -9.75842 | -0.36285 | 0.07109  |
|                  | H  | 8.71466  | -1.49783 | 0.82055  |                    | H  | -8.69246 | -1.48723 | -0.78493 |
|                  | H  | 5.84415  | 1.98159  | -0.17342 |                    | H  | -5.73530 | 1.98783  | -0.08931 |
|                  | Br | -5.31616 | -1.94078 | 0.02385  |                    | Br | 5.37512  | -1.87603 | -0.00351 |

|                         |    |         |          |          |                          |    |          |          |          |
|-------------------------|----|---------|----------|----------|--------------------------|----|----------|----------|----------|
| <b>T3(ground state)</b> | H  | 7.01295 | 4.63822  | -5.51125 | <b>T3(excited state)</b> | H  | -4.23010 | 3.21037  | 0.00016  |
|                         | C  | 7.39019 | 4.91811  | -4.53386 |                          | C  | -4.34148 | 2.13132  | 0.00010  |
|                         | C  | 7.63357 | 6.24082  | -4.20617 |                          | C  | -5.59710 | 1.53783  | 0.00014  |
|                         | C  | 8.12072 | 6.57103  | -2.93574 |                          | C  | -5.69280 | 0.14296  | 0.00006  |
|                         | C  | 8.36667 | 5.59507  | -1.99136 |                          | C  | -4.57108 | -0.66123 | -0.00007 |
|                         | C  | 8.12370 | 4.25019  | -2.31199 |                          | C  | -3.29009 | -0.07344 | -0.00014 |
|                         | C  | 7.63768 | 3.93087  | -3.58215 |                          | C  | -3.20848 | 1.32852  | -0.00005 |
|                         | O  | 7.39114 | 2.64505  | -3.92835 |                          | O  | -1.99769 | 1.94994  | -0.00012 |
|                         | C  | 7.59089 | 1.56855  | -3.08579 |                          | C  | -0.78970 | 1.28423  | -0.00045 |
|                         | C  | 8.10286 | 1.87510  | -1.74057 |                          | C  | -0.84012 | -0.18160 | -0.00026 |
|                         | C  | 8.34671 | 3.16436  | -1.40259 |                          | C  | -2.07365 | -0.80737 | -0.00020 |
|                         | H  | 7.44712 | 7.02355  | -4.93349 |                          | H  | -6.49314 | 2.14799  | 0.00025  |
|                         | H  | 8.74431 | 5.85370  | -1.00725 |                          | H  | -4.66206 | -1.74251 | -0.00011 |
|                         | H  | 8.72433 | 3.36447  | -0.40310 |                          | H  | -2.08954 | -1.89197 | -0.00013 |
|                         | C  | 8.38511 | 0.82997  | -0.67739 |                          | C  | 0.34645  | -1.04103 | -0.00011 |
|                         | O  | 8.81032 | 1.22965  | 0.40267  |                          | O  | 0.22497  | -2.28565 | -0.00041 |
|                         | O  | 7.32258 | 0.48624  | -3.54732 |                          | O  | 0.18672  | 2.00455  | 0.00028  |
|                         | C  | 8.15188 | -0.58865 | -0.95530 |                          | C  | 1.68066  | -0.44756 | -0.00013 |
|                         | H  | 7.77599 | -0.85948 | -1.93233 |                          | H  | 1.75997  | 0.63154  | -0.00018 |
|                         | C  | 8.40962 | -1.50312 | 0.00338  |                          | C  | 2.79969  | -1.26685 | -0.00006 |
|                         | H  | 8.78599 | -1.12324 | 0.95316  |                          | H  | 2.61870  | -2.33924 | 0.00003  |
|                         | C  | 8.24361 | -2.94301 | -0.08168 |                          | C  | 4.13996  | -0.81330 | -0.00004 |
|                         | C  | 8.56626 | -3.73977 | 1.02650  |                          | C  | 5.21048  | -1.75985 | 0.00017  |
|                         | C  | 7.77033 | -3.60462 | -1.22724 |                          | C  | 4.50990  | 0.56941  | -0.00024 |
|                         | C  | 8.43035 | -5.11596 | 1.00852  |                          | C  | 6.52192  | -1.37735 | 0.00023  |
|                         | C  | 7.62732 | -4.97691 | -1.26602 |                          | C  | 5.81873  | 0.96466  | -0.00019 |
|                         | C  | 7.95429 | -5.77722 | -0.14496 |                          | C  | 6.87820  | 0.00764  | 0.00006  |
|                         | H  | 8.93581 | -3.26217 | 1.93124  |                          | H  | 4.96438  | -2.81808 | 0.00031  |
|                         | H  | 7.50628 | -3.03351 | -2.11283 |                          | H  | 3.73739  | 1.33102  | -0.00045 |
|                         | H  | 8.69602 | -5.67735 | 1.89611  |                          | H  | 7.29146  | -2.13933 | 0.00041  |
|                         | N  | 7.81344 | -7.14096 | -0.17999 |                          | N  | 8.17457  | 0.39620  | 0.00012  |
|                         | C  | 7.32265 | -7.79032 | -1.37801 |                          | C  | 8.52135  | 1.80988  | 0.00002  |
|                         | H  | 7.98033 | -7.60702 | -2.23794 |                          | H  | 8.12809  | 2.31231  | 0.89117  |
|                         | H  | 7.28114 | -8.86726 | -1.21173 |                          | H  | 9.60552  | 1.91277  | 0.00020  |
|                         | H  | 6.31186 | -7.45029 | -1.63938 |                          | H  | 8.12840  | 2.31211  | -0.89139 |
|                         | C  | 8.15584 | -7.93390 | 0.98229  |                          | C  | 9.24310  | -0.59229 | 0.00032  |
|                         | H  | 7.54505 | -7.66194 | 1.85339  |                          | H  | 9.19312  | -1.22806 | -0.89103 |
|                         | H  | 7.97844 | -8.98754 | 0.76433  |                          | H  | 10.20421 | -0.08015 | 0.00026  |
|                         | H  | 9.21337 | -7.81899 | 1.25480  |                          | H  | 9.19307  | -1.22778 | 0.89186  |
|                         | H  | 7.25775 | -5.43392 | -2.17615 |                          | H  | 6.04118  | 2.02446  | -0.00035 |
|                         | Br | 8.44475 | 8.38870  | -2.51449 |                          | Br | -7.41486 | -0.65906 | 0.00015  |

|                  |         |         |          |          |                   |         |          |          |          |
|------------------|---------|---------|----------|----------|-------------------|---------|----------|----------|----------|
| T4(ground state) | C       | 7.39040 | 4.92392  | -4.53422 | T4(excited state) | C       | 5.05869  | -0.34934 | 0.00004  |
|                  | C       | 7.63492 | 6.24628  | -4.20070 |                   | C       | 6.17155  | 0.48118  | 0.00009  |
|                  | C       | 8.12133 | 6.58190  | -2.93260 |                   | C       | 6.00154  | 1.86948  | 0.00010  |
|                  | C       | 8.36236 | 5.59145  | -1.99945 |                   | C       | 4.73350  | 2.41922  | 0.00006  |
|                  | C       | 8.11964 | 4.24777  | -2.32229 |                   | C       | 3.59372  | 1.59168  | 0.00001  |
|                  | C       | 7.63330 | 3.92053  | -3.59240 |                   | C       | 3.77811  | 0.19804  | 0.00000  |
|                  | O       | 7.38945 | 2.63822  | -3.93459 |                   | O       | 2.71340  | -0.64074 | -0.00004 |
|                  | C       | 7.59006 | 1.55967  | -3.09087 |                   | C       | 1.39689  | -0.22145 | -0.00009 |
|                  | C       | 8.10099 | 1.86891  | -1.74759 |                   | C       | 1.16455  | 1.22568  | -0.00007 |
|                  | C       | 8.34218 | 3.15980  | -1.41506 |                   | C       | 2.25599  | 2.07310  | -0.00002 |
|                  | H       | 7.44466 | 7.02138  | -4.93556 |                   | H       | 7.16434  | 0.04499  | 0.00012  |
|                  | H       | 8.73991 | 5.83588  | -1.01092 |                   | H       | 4.59535  | 3.49651  | 0.00007  |
|                  | H       | 8.71963 | 3.36331  | -0.41611 |                   | H       | 2.06449  | 3.14090  | -0.00001 |
|                  | C       | 8.38451 | 0.82701  | -0.68262 |                   | C       | -0.16541 | 1.84207  | -0.00010 |
|                  | O       | 8.80951 | 1.22891  | 0.39687  |                   | O       | -0.28336 | 3.08727  | -0.00007 |
|                  | O       | 7.32203 | 0.47896  | -3.55386 |                   | O       | 0.58102  | -1.11801 | -0.00017 |
|                  | C       | 8.15150 | -0.59196 | -0.95890 |                   | C       | -1.35872 | 1.00237  | -0.00010 |
|                  | H       | 7.77557 | -0.86347 | -1.93575 |                   | H       | -1.22708 | -0.07152 | -0.00014 |
|                  | C       | 8.40923 | -1.50583 | 0.00025  |                   | C       | -2.61735 | 1.58568  | -0.00004 |
|                  | H       | 8.78565 | -1.12509 | 0.94972  |                   | H       | -2.65261 | 2.67267  | 0.00001  |
|                  | C       | 8.24336 | -2.94582 | -0.08337 |                   | C       | -3.84082 | 0.87490  | -0.00003 |
|                  | C       | 8.56617 | -3.74089 | 1.02595  |                   | C       | -5.07864 | 1.58893  | 0.00008  |
|                  | C       | 7.77023 | -3.60911 | -1.22812 |                   | C       | -3.92792 | -0.55408 | -0.00011 |
|                  | C       | 8.43060 | -5.11711 | 1.00999  |                   | C       | -6.28753 | 0.95270  | 0.00010  |
|                  | C       | 7.62756 | -4.98147 | -1.26486 |                   | C       | -5.13182 | -1.20221 | -0.00008 |
|                  | C       | 7.95469 | -5.78003 | -0.14259 |                   | C       | -6.36070 | -0.47556 | 0.00002  |
|                  | H       | 8.93560 | -3.26191 | 1.93001  |                   | H       | -5.04853 | 2.67501  | 0.00014  |
|                  | H       | 7.50612 | -3.03920 | -2.11447 |                   | H       | -3.01901 | -1.14639 | -0.00020 |
|                  | H       | 8.69625 | -5.67758 | 1.89819  |                   | H       | -7.19290 | 1.54685  | 0.00019  |
|                  | N       | 7.81404 | -7.14381 | -0.17594 |                   | N       | -7.55384 | -1.11484 | 0.00005  |
|                  | C       | 7.32335 | -7.79459 | -1.37317 |                   | C       | -7.61159 | -2.56904 | 0.00000  |
|                  | H       | 7.98103 | -7.61236 | -2.23334 |                   | H       | -7.12626 | -2.98320 | 0.89121  |
|                  | H       | 7.28185 | -8.87136 | -1.20567 |                   | H       | -8.65347 | -2.88617 | 0.00006  |
|                  | H       | 6.31255 | -7.45498 | -1.63506 |                   | H       | -7.12638 | -2.98313 | -0.89130 |
|                  | C       | 8.15649 | -7.93519 | 0.98723  |                   | C       | -8.79804 | -0.35964 | 0.00015  |
|                  | H       | 7.54563 | -7.66227 | 1.85800  |                   | H       | -8.87601 | 0.27333  | -0.89122 |
|                  | H       | 7.97930 | -8.98916 | 0.77061  |                   | H       | -9.63767 | -1.05325 | 0.00013  |
|                  | H       | 9.21402 | -7.81978 | 1.25966  |                   | H       | -8.87595 | 0.27321  | 0.89161  |
|                  | H       | 7.25816 | -5.44047 | -2.17410 |                   | H       | -5.13921 | -2.28516 | -0.00015 |
|                  | Br      | 6.73554 | 4.47460  | -6.24216 |                   | Br      | 5.28021  | -2.22554 | 0.00003  |
| H                | 8.30661 | 7.62280 | -2.69015 | H        | 6.87570           | 2.51272 | 0.00014  |          |          |

|                         |         |         |          |          |                          |          |           |          |          |
|-------------------------|---------|---------|----------|----------|--------------------------|----------|-----------|----------|----------|
| <b>T5(ground state)</b> | C       | 7.39051 | 4.92552  | -4.53397 | <b>T5(excited state)</b> | C        | 3.85772   | 1.22300  | -0.00001 |
|                         | C       | 7.63367 | 6.24793  | -4.20343 |                          | C        | 5.06181   | 0.52967  | 0.00016  |
|                         | C       | 8.11949 | 6.56861  | -2.93281 |                          | C        | 5.03249   | -0.86560 | 0.00010  |
|                         | C       | 8.36370 | 5.58699  | -1.99369 |                          | C        | 3.84497   | -1.56824 | -0.00012 |
|                         | C       | 8.11891 | 4.24685  | -2.32408 |                          | C        | 2.62137   | -0.87064 | -0.00032 |
|                         | C       | 7.63308 | 3.92016  | -3.59314 |                          | C        | 2.64769   | 0.53593  | -0.00027 |
|                         | O       | 7.38919 | 2.64017  | -3.93677 |                          | O        | 1.49640   | 1.24966  | -0.00046 |
|                         | C       | 7.59010 | 1.56019  | -3.09243 |                          | C        | 0.23406   | 0.68291  | -0.00093 |
|                         | C       | 8.10126 | 1.87003  | -1.74838 |                          | C        | 0.16845   | -0.77882 | -0.00059 |
|                         | C       | 8.34258 | 3.15914  | -1.41428 |                          | C        | 1.35013   | -1.50249 | -0.00041 |
|                         | H       | 7.44643 | 7.02945  | -4.93106 |                          | H        | 6.00235   | 1.06689  | 0.00035  |
|                         | H       | 8.74086 | 5.83843  | -1.00789 |                          | H        | 3.84031   | -2.65295 | -0.00012 |
|                         | H       | 8.71992 | 3.36281  | -0.41541 |                          | H        | 1.28203   | -2.58464 | -0.00023 |
|                         | C       | 8.38524 | 0.82648  | -0.68185 |                          | C        | -1.08111  | -1.53755 | -0.00030 |
|                         | O       | 8.80999 | 1.23182  | 0.39602  |                          | O        | -1.06660  | -2.78620 | -0.00046 |
|                         | O       | 7.32237 | 0.48061  | -3.55523 |                          | O        | -0.67655  | 1.48317  | -0.00016 |
|                         | C       | 8.15250 | -0.59097 | -0.95779 |                          | C        | -2.36546  | -0.83447 | -0.00021 |
|                         | H       | 7.77658 | -0.86388 | -1.93420 |                          | H        | -2.35448  | 0.24736  | -0.00022 |
|                         | C       | 8.41050 | -1.50472 | 0.00230  |                          | C        | -3.54689  | -1.55599 | -0.00012 |
|                         | H       | 8.78689 | -1.12362 | 0.95162  |                          | H        | -3.45779  | -2.64000 | -0.00011 |
|                         | C       | 8.24448 | -2.94388 | -0.08158 |                          | C        | -4.84430  | -0.98982 | -0.00002 |
|                         | C       | 8.56704 | -3.73967 | 1.02756  |                          | C        | -5.98998  | -1.84271 | 0.00008  |
|                         | C       | 7.77116 | -3.60635 | -1.22697 |                          | C        | -5.09430  | 0.41877  | -0.00002 |
|                         | C       | 8.43100 | -5.11559 | 1.01071  |                          | C        | -7.26424  | -1.35076 | 0.00018  |
|                         | C       | 7.62802 | -4.97839 | -1.26462 |                          | C        | -6.36400  | 0.92412  | 0.00007  |
|                         | C       | 7.95488 | -5.77776 | -0.14251 |                          | C        | -7.50119  | 0.05967  | 0.00018  |
|                         | H       | 8.93653 | -3.26132 | 1.93190  |                          | H        | -5.83420  | -2.91790 | 0.00008  |
|                         | H       | 7.50733 | -3.03576 | -2.11298 |                          | H        | -4.26000  | 1.11210  | -0.00009 |
|                         | H       | 8.69644 | -5.67644 | 1.89869  |                          | H        | -8.09535  | -2.04483 | 0.00026  |
|                         | N       | 7.81380 | -7.14094 | -0.17671 |                          | N        | -8.75793  | 0.55684  | 0.00028  |
|                         | C       | 7.32288 | -7.79084 | -1.37459 |                          | C        | -8.98345  | 1.99567  | 0.00026  |
|                         | H       | 7.98085 | -7.60810 | -2.23435 |                          | H        | -8.54949  | 2.46203  | -0.89128 |
|                         | H       | 7.28097 | -8.86764 | -1.20777 |                          | H        | -10.05492 | 2.18989  | 0.00034  |
|                         | H       | 6.31230 | -7.45047 | -1.63606 |                          | H        | -8.54934  | 2.46208  | 0.89170  |
|                         | C       | 8.15586 | -7.93361 | 0.98604  |                          | C        | -9.90794  | -0.33677 | 0.00040  |
|                         | H       | 7.54495 | -7.66089 | 1.85676  |                          | H        | -9.91200  | -0.97362 | 0.89205  |
|                         | H       | 7.97821 | -8.98725 | 0.76840  |                          | H        | -10.82133 | 0.25611  | 0.00050  |
|                         | H       | 9.21338 | -7.81861 | 1.25843  |                          | H        | -9.91219  | -0.97363 | -0.89125 |
|                         | H       | 7.25856 | -5.43678 | -2.17409 |                          | H        | -6.49635  | 1.99881  | 0.00007  |
|                         | Br      | 6.73689 | 4.48254  | -6.24039 |                          | Br       | 3.87033   | 3.10927  | 0.00007  |
| Br                      | 8.44294 | 8.38223 | -2.50742 | Br       | 6.67817                  | -1.80910 | 0.00038   |          |          |

|                           |    |          |          |          |                            |    |          |          |          |
|---------------------------|----|----------|----------|----------|----------------------------|----|----------|----------|----------|
| <b>T6a</b> (ground state) | H  | 6.33071  | 4.63974  | -5.20283 | <b>T6a</b> (excited state) | H  | -6.80201 | -2.67605 | 0.00056  |
|                           | C  | 6.94559  | 4.91624  | -4.35322 |                            | C  | -6.74856 | -1.59241 | 0.00042  |
|                           | C  | 7.32038  | 6.22902  | -4.11440 |                            | C  | -7.88999 | -0.80223 | 0.00050  |
|                           | C  | 8.11605  | 6.56453  | -3.00957 |                            | C  | -7.78919 | 0.59623  | 0.00031  |
|                           | C  | 8.53745  | 5.57649  | -2.14015 |                            | C  | -6.54675 | 1.20176  | 0.00005  |
|                           | C  | 8.17084  | 4.23786  | -2.36051 |                            | C  | -5.37127 | 0.42464  | -0.00004 |
|                           | C  | 7.37697  | 3.92979  | -3.46937 |                            | C  | -5.50439 | -0.97169 | 0.00014  |
|                           | O  | 7.00036  | 2.65042  | -3.71913 |                            | O  | -4.40221 | -1.77007 | 0.00005  |
|                           | C  | 7.35337  | 1.57534  | -2.93089 |                            | C  | -3.10834 | -1.29807 | -0.00026 |
|                           | C  | 8.18826  | 1.86920  | -1.75677 |                            | C  | -2.93290 | 0.16134  | -0.00028 |
|                           | C  | 8.56056  | 3.15109  | -1.51412 |                            | C  | -4.05211 | 0.96005  | -0.00023 |
|                           | H  | 6.99077  | 7.00747  | -4.79579 |                            | H  | -8.86737 | -1.27505 | 0.00072  |
|                           | H  | 8.39898  | 7.59811  | -2.83963 |                            | H  | -8.68920 | 1.20317  | 0.00038  |
|                           | H  | 9.15435  | 5.81786  | -1.27894 |                            | H  | -6.45642 | 2.28459  | -0.00010 |
|                           | H  | 9.17784  | 3.34304  | -0.64008 |                            | H  | -3.89842 | 2.03488  | -0.00032 |
|                           | C  | 8.67428  | 0.82368  | -0.77626 |                            | C  | -1.62236 | 0.84013  | -0.00039 |
|                           | O  | 9.36593  | 1.20370  | 0.16280  |                            | O  | -1.57329 | 2.09093  | -0.00030 |
|                           | O  | 6.93488  | 0.50060  | -3.29169 |                            | O  | -2.25061 | -2.15537 | -0.00047 |
|                           | C  | 8.31776  | -0.58971 | -0.96319 |                            | C  | -0.40148 | 0.05731  | -0.00031 |
|                           | H  | 7.70425  | -0.84288 | -1.81672 |                            | H  | -0.48992 | -1.02066 | -0.00033 |
|                           | C  | 8.76296  | -1.50108 | -0.07655 |                            | C  | 0.83242  | 0.70637  | -0.00022 |
|                           | H  | 9.37271  | -1.12634 | 0.74168  |                            | H  | 0.80316  | 1.79096  | -0.00020 |
|                           | C  | 8.51230  | -2.93452 | -0.10065 |                            | C  | 2.08252  | 0.05296  | -0.00014 |
|                           | C  | 9.02053  | -3.81185 | 0.87175  |                            | C  | 3.33653  | 0.75885  | 0.00002  |
|                           | C  | 7.73831  | -3.54090 | -1.10741 |                            | C  | 2.20088  | -1.37848 | -0.00021 |
|                           | C  | 8.78748  | -5.17555 | 0.85690  |                            | C  | 4.54865  | 0.12287  | 0.00011  |
|                           | C  | 7.48634  | -4.89483 | -1.15286 |                            | C  | 3.40137  | -2.02766 | -0.00013 |
|                           | C  | 8.00827  | -5.75901 | -0.16324 |                            | C  | 4.62772  | -1.29912 | 0.00004  |
|                           | H  | 9.21595  | -5.78120 | 1.64402  |                            | H  | 5.44828  | 0.72382  | 0.00024  |
|                           | N  | 7.77028  | -7.10652 | -0.18941 |                            | N  | 5.82699  | -1.93104 | 0.00012  |
|                           | C  | 6.96559  | -7.67871 | -1.25012 |                            | C  | 5.89122  | -3.38408 | 0.00009  |
|                           | H  | 7.41372  | -7.50546 | -2.23714 |                            | H  | 5.40834  | -3.80169 | -0.89125 |
|                           | H  | 6.88927  | -8.75609 | -1.10097 |                            | H  | 6.93478  | -3.69600 | 0.00018  |
|                           | H  | 5.94852  | -7.26569 | -1.25493 |                            | H  | 5.40817  | -3.80174 | 0.89132  |
|                           | C  | 8.32216  | -7.96063 | 0.84252  |                            | C  | 7.06415  | -1.16670 | 0.00030  |
|                           | H  | 7.95393  | -7.68180 | 1.83853  |                            | H  | 7.13741  | -0.53245 | 0.89175  |
|                           | H  | 8.02565  | -8.99235 | 0.65185  |                            | H  | 7.90957  | -1.85335 | 0.00031  |
|                           | H  | 9.41927  | -7.92146 | 0.85646  |                            | H  | 7.13757  | -0.53229 | -0.89102 |
|                           | H  | 6.88050  | -5.28448 | -1.96164 |                            | H  | 3.40743  | -3.11053 | -0.00019 |
|                           | H  | 7.31583  | -2.91807 | -1.88975 |                            | H  | 1.29471  | -1.97354 | -0.00035 |
|                           | Br | 10.08968 | -3.16413 | 2.30880  |                            | Br | 3.34929  | 2.64734  | 0.00013  |



|                  |         |          |          |          |                   |         |          |          |          |
|------------------|---------|----------|----------|----------|-------------------|---------|----------|----------|----------|
| T7(ground state) | H       | 6.77908  | 4.69864  | -5.38482 | T7(excited state) | H       | 6.53727  | -2.79360 | 0.38276  |
|                  | C       | 7.25267  | 4.96232  | -4.44541 |                   | C       | 6.66494  | -1.72545 | 0.24319  |
|                  | C       | 7.55655  | 6.27444  | -4.11907 |                   | C       | 7.92075  | -1.14069 | 0.16057  |
|                  | C       | 8.16926  | 6.59343  | -2.89862 |                   | C       | 8.05268  | 0.24180  | -0.02007 |
|                  | C       | 8.47811  | 5.58934  | -2.00099 |                   | C       | 6.92647  | 1.03898  | -0.11760 |
|                  | C       | 8.18005  | 4.25064  | -2.30842 |                   | C       | 5.64206  | 0.47138  | -0.03678 |
|                  | C       | 7.56937  | 3.95934  | -3.53228 |                   | C       | 5.54230  | -0.91237 | 0.14333  |
|                  | O       | 7.26482  | 2.68110  | -3.86999 |                   | O       | 4.32098  | -1.51795 | 0.22761  |
|                  | C       | 7.51959  | 1.59060  | -3.06649 |                   | C       | 3.12760  | -0.85948 | 0.14667  |
|                  | C       | 8.15651  | 1.86714  | -1.77033 |                   | C       | 3.19628  | 0.60485  | -0.03534 |
|                  | C       | 8.46130  | 3.14788  | -1.44071 |                   | C       | 4.42866  | 1.22088  | -0.12603 |
|                  | H       | 7.31488  | 7.06571  | -4.82219 |                   | H       | 8.80603  | -1.76420 | 0.23698  |
|                  | H       | 8.39911  | 7.62698  | -2.66178 |                   | H       | 9.03997  | 0.68793  | -0.08357 |
|                  | H       | 8.95256  | 5.81783  | -1.05065 |                   | H       | 7.01816  | 2.11259  | -0.25763 |
|                  | H       | 8.93529  | 3.32552  | -0.47848 |                   | H       | 4.49613  | 2.29487  | -0.26596 |
|                  | C       | 8.50514  | 0.80306  | -0.75635 |                   | C       | 1.99718  | 1.38944  | -0.12130 |
|                  | O       | 9.07300  | 1.15503  | 0.27136  |                   | O       | 2.18080  | 2.67109  | -0.29284 |
|                  | O       | 7.19325  | 0.51754  | -3.51535 |                   | O       | 2.13004  | -1.53570 | 0.23128  |
|                  | C       | 8.15717  | -0.60744 | -1.00671 |                   | C       | 0.64745  | 0.92763  | -0.05658 |
|                  | H       | 7.66297  | -0.84687 | -1.93874 |                   | H       | 0.53799  | -0.14575 | 0.02056  |
|                  | C       | 8.46208  | -1.53527 | -0.08339 |                   | C       | -0.41459 | 1.77965  | -0.08637 |
|                  | H       | 8.96644  | -1.19232 | 0.81927  |                   | H       | -0.23490 | 2.85196  | -0.12426 |
|                  | C       | 8.19250  | -2.96964 | -0.15660 |                   | C       | -1.81505 | 1.38603  | -0.04553 |
|                  | C       | 8.61105  | -3.80007 | 0.88674  |                   | C       | -2.80475 | 2.36700  | 0.09092  |
|                  | C       | 7.51243  | -3.56206 | -1.23015 |                   | C       | -2.23621 | 0.05086  | -0.15203 |
|                  | C       | 8.38790  | -5.16870 | 0.85035  |                   | C       | -4.14809 | 2.03088  | 0.15800  |
|                  | C       | 7.27355  | -4.92339 | -1.25057 |                   | C       | -3.57912 | -0.27390 | -0.10644 |
|                  | C       | 7.72232  | -5.77766 | -0.22177 |                   | C       | -4.58148 | 0.70079  | 0.07408  |
|                  | H       | 9.13590  | -3.36874 | 1.73525  |                   | H       | -2.51436 | 3.41180  | 0.16597  |
|                  | H       | 7.13876  | -2.95578 | -2.04838 |                   | H       | -1.51573 | -0.74530 | -0.30603 |
|                  | N       | 7.47063  | -7.15990 | -0.26288 |                   | N       | -5.94190 | 0.34645  | 0.12167  |
|                  | C       | 8.22548  | -7.90786 | -1.26431 |                   | C       | -6.36337 | -0.35730 | 1.32949  |
|                  | H       | 8.21677  | -7.38855 | -2.22275 |                   | H       | -5.65587 | -1.14760 | 1.58166  |
|                  | H       | 9.27247  | -8.05899 | -0.95314 |                   | H       | -6.45097 | 0.32758  | 2.18938  |
|                  | H       | 7.75854  | -8.88748 | -1.40586 |                   | H       | -7.33889 | -0.82043 | 1.15144  |
|                  | C       | 7.44155  | -7.85233 | 1.01180  |                   | C       | -6.89235 | 1.37475  | -0.25756 |
|                  | H       | 6.83203  | -7.29453 | 1.72719  |                   | H       | -6.57438 | 1.85377  | -1.18708 |
|                  | H       | 6.98092  | -8.83342 | 0.86041  |                   | H       | -7.86327 | 0.90033  | -0.43080 |
|                  | H       | 8.44262  | -8.01620 | 1.44745  |                   | H       | -7.03280 | 2.15199  | 0.51396  |
|                  | Br      | 6.24269  | -5.61016 | -2.68813 |                   | Br      | -4.04868 | -2.09302 | -0.37617 |
| H                | 8.75011 | -5.78165 | 1.66840  | H        | -4.87988          | 2.82036 | 0.29068  |          |          |

|                         |         |          |          |          |                          |          |          |          |          |
|-------------------------|---------|----------|----------|----------|--------------------------|----------|----------|----------|----------|
| <b>T8(ground state)</b> | H       | -6.06621 | -2.67336 | 0.07929  | <b>T8(excited state)</b> | H        | -6.91037 | -1.79145 | 1.90713  |
|                         | C       | -6.07494 | -1.58977 | 0.03385  |                          | C        | -6.87991 | -0.98344 | 1.18390  |
|                         | C       | -7.25587 | -0.86695 | -0.02683 |                          | C        | -8.03554 | -0.37385 | 0.71552  |
|                         | C       | -7.24458 | 0.53408  | -0.08472 |                          | C        | -7.96265 | 0.66739  | -0.21800 |
|                         | C       | -6.04078 | 1.21257  | -0.08224 |                          | C        | -6.73268 | 1.09773  | -0.68235 |
|                         | C       | -4.82945 | 0.50253  | -0.02144 |                          | C        | -5.54622 | 0.49676  | -0.22419 |
|                         | C       | -4.86805 | -0.89428 | 0.03638  |                          | C        | -5.65105 | -0.54093 | 0.70917  |
|                         | O       | -3.72316 | -1.61948 | 0.09745  |                          | O        | -4.53364 | -1.16155 | 1.19090  |
|                         | C       | -2.46017 | -1.06511 | 0.10907  |                          | C        | -3.25705 | -0.84225 | 0.82127  |
|                         | C       | -2.38931 | 0.40190  | 0.03937  |                          | C        | -3.11076 | 0.25285  | -0.15789 |
|                         | C       | -3.53862 | 1.12094  | -0.01665 |                          | C        | -4.23793 | 0.87849  | -0.65300 |
|                         | H       | -8.20319 | -1.39751 | -0.02921 |                          | H        | -9.00163 | -0.71009 | 1.07874  |
|                         | H       | -8.17987 | 1.08200  | -0.13151 |                          | H        | -8.87254 | 1.13715  | -0.57767 |
|                         | H       | -6.01270 | 2.29780  | -0.12688 |                          | H        | -6.66575 | 1.90464  | -1.40699 |
|                         | H       | -3.45923 | 2.20442  | -0.05964 |                          | H        | -4.14174 | 1.67924  | -1.37909 |
|                         | C       | -1.09702 | 1.18198  | 0.03217  |                          | C        | -1.81184 | 0.66444  | -0.60344 |
|                         | O       | -1.16443 | 2.40478  | 0.05357  |                          | O        | -1.78255 | 1.61192  | -1.49527 |
|                         | O       | -1.54147 | -1.84532 | 0.17984  |                          | O        | -2.36969 | -1.48491 | 1.32988  |
|                         | C       | 0.19987  | 0.47621  | -0.01362 |                          | C        | -0.54331 | 0.12493  | -0.21218 |
|                         | H       | 0.19359  | -0.60104 | -0.09352 |                          | H        | -0.56867 | -0.78300 | 0.37308  |
|                         | C       | 1.32953  | 1.19495  | 0.06964  |                          | C        | 0.60849  | 0.74545  | -0.58681 |
|                         | H       | 1.22279  | 2.26825  | 0.21126  |                          | H        | 0.53435  | 1.70763  | -1.08780 |
|                         | C       | 2.70412  | 0.68536  | 0.04203  |                          | C        | 1.95872  | 0.28808  | -0.29298 |
|                         | C       | 3.68369  | 1.24923  | 0.87978  |                          | C        | 2.96684  | 1.21333  | 0.05351  |
|                         | C       | 3.18577  | -0.33721 | -0.79501 |                          | C        | 2.40717  | -1.04860 | -0.34751 |
|                         | C       | 5.00146  | 0.83862  | 0.92342  |                          | C        | 4.27025  | 0.87165  | 0.34817  |
|                         | C       | 4.49919  | -0.77232 | -0.78910 |                          | C        | 3.70294  | -1.43150 | -0.05663 |
|                         | C       | 5.44598  | -0.20068 | 0.08289  |                          | C        | 4.67418  | -0.47860 | 0.31098  |
|                         | H       | 5.67490  | 1.32620  | 1.61510  |                          | H        | 4.96560  | 1.65588  | 0.61499  |
|                         | N       | 6.74417  | -0.63265 | 0.10825  |                          | N        | 5.95591  | -0.84710 | 0.61091  |
|                         | C       | 7.17184  | -1.69024 | -0.78530 |                          | C        | 6.34185  | -2.24291 | 0.54679  |
|                         | H       | 7.06206  | -1.40340 | -1.83976 |                          | H        | 6.23899  | -2.64797 | -0.46867 |
|                         | H       | 8.22431  | -1.90907 | -0.60354 |                          | H        | 7.38604  | -2.33985 | 0.84447  |
|                         | H       | 6.60246  | -2.61298 | -0.61641 |                          | H        | 5.73908  | -2.85659 | 1.22789  |
|                         | C       | 7.70150  | 0.00896  | 0.98655  |                          | C        | 6.94043  | 0.16390  | 0.94207  |
|                         | H       | 7.40948  | -0.08785 | 2.04015  |                          | H        | 6.65130  | 0.72899  | 1.83733  |
|                         | H       | 8.67486  | -0.46671 | 0.86444  |                          | H        | 7.89609  | -0.31954 | 1.14539  |
|                         | H       | 7.81470  | 1.07644  | 0.75510  |                          | H        | 7.08790  | 0.87270  | 0.11665  |
|                         | H       | 4.78249  | -1.55548 | -1.47882 |                          | H        | 3.95773  | -2.47958 | -0.13435 |
|                         | Br      | 3.19887  | 2.64505  | 2.07759  |                          | Br       | 2.53740  | 3.06181  | 0.16746  |
| Br                      | 2.06601 | -1.17220 | -2.08372 | Br       | 1.25940                  | -2.45294 | -0.91460 |          |          |
